1 ***Listeria* phages induce Cas9 degradation to protect lysogenic genomes**

2 **Authors**

3 Beatriz A. Osuna<sup>1</sup>, Shweta Karambelkar<sup>1</sup>, Caroline Mahendra<sup>1</sup>, Kathleen A. Christie<sup>2,3,4</sup>, Bianca  
4 Garcia<sup>5</sup>, Alan R. Davidson<sup>5,6</sup>, Benjamin P. Kleinstiver<sup>2,3,4</sup>, Samuel Kilcher<sup>7</sup>, Joseph Bondy-  
5 Denomy<sup>1,8,9,\*</sup>

6 **Affiliations**

7 <sup>1</sup>Department of Microbiology and Immunology, University of California, San Francisco, San Francisco, CA 94158,  
8 USA

9 <sup>2</sup>Center for Genomic Medicine, Massachusetts General Hospital, Boston, MA 02114, USA

10 <sup>3</sup>Department of Pathology, Massachusetts General Hospital, Boston, MA 02114, USA

11 <sup>4</sup>Department of Pathology, Harvard Medical School, Boston, MA 02115, USA

12 <sup>5</sup>Department of Molecular Genetics, University of Toronto, Toronto, ON M5G 1M1, Canada

13 <sup>6</sup>Department of Biochemistry, University of Toronto, Toronto, ON M5G 1M1, Canada

14 <sup>7</sup>Institute of Food, Nutrition, and Health, ETH Zurich, Zurich CH 8092, Switzerland

15 <sup>8</sup>Quantitative Biosciences Institute, University of California, San Francisco, San Francisco, CA 94158, USA

16 <sup>9</sup>Lead Contact

17 **Contact Information**

18 \*Correspondence: [joseph.bondy-denomy@ucsf.edu](mailto:joseph.bondy-denomy@ucsf.edu)

19 **SUMMARY**

20 Bacterial CRISPR-Cas systems employ RNA-guided nucleases to destroy foreign DNA.  
21 Bacteriophages, in turn, have evolved diverse “anti-CRISPR” proteins (Acrs) to counteract  
22 acquired immunity. In *Listeria monocytogenes*, prophages encode 2-3 distinct anti-Cas9  
23 proteins, with *acrIIA1* always present; however, its mechanism is unknown. Here, we report that  
24 AcrIIA1 binds with high affinity to Cas9 via the catalytic HNH domain and, in *Listeria*, triggers  
25 Cas9 degradation. AcrIIA1 displays broad-spectrum inhibition of Type II-A and II-C Cas9s,  
26 including an additional highly-diverged *Listeria* Cas9. During lytic infection, AcrIIA1 is insufficient  
27 for rapid Cas9 inactivation, thus phages require an additional “partner” Acr that rapidly blocks  
28 Cas9-DNA-binding. The AcrIIA1 N-terminal domain (AcrIIA1<sup>NTD</sup>) is dispensable for anti-CRISPR  
29 activity; instead it is required for optimal phage replication through direct transcriptional  
30 repression of the anti-CRISPR locus. AcrIIA1<sup>NTD</sup> is widespread amongst *Firmicutes*, can repress  
31 anti-CRISPR deployment by other phages, and has been co-opted by hosts potentially as an  
32 “anti-anti-CRISPR.” In summary, *Listeria* phages utilize narrow-spectrum inhibitors of DNA  
33 binding to rapidly inactivate Cas9 in lytic growth and the broad-spectrum AcrIIA1 to stimulate  
34 Cas9 degradation for protection of the *Listeria* genome in lysogeny.

## 35 INTRODUCTION

36 All cells must combat viral infections to survive. Bacteria have evolved innate and  
37 adaptive defense mechanisms against bacterial viruses (phages), which constantly pose a risk  
38 of infection. One such defense mechanism is CRISPR-Cas, a common and diverse adaptive  
39 immune system in prokaryotes that encompasses two distinct classes and six types (I-VI)  
40 (Koonin et al., 2017; Makarova et al., 2015). The CRISPR array maintains a genetic record of  
41 past viral infections with phage DNA fragments (spacers) retained between clustered regularly  
42 interspaced short palindromic repeats (CRISPR) (Mojica et al., 2005). These phage-derived  
43 spacers are transcribed into CRISPR RNAs (crRNAs) that complex with Cas nucleases to guide  
44 the sequence-specific destruction of invading nucleic acids (Brouns et al., 2008; Garneau et al.,  
45 2010). The CRISPR-associated (cas) genes typically neighbor the CRISPR array and encode  
46 proteins that facilitate spacer acquisition into the CRISPR array (Nuñez et al., 2014; Yosef et al.,  
47 2012), generate mature crRNAs (Deltcheva et al., 2011; Haurwitz et al., 2010), and cleave  
48 invading genomes (Garneau et al., 2010).

49 To counteract bacterial immunity, phages have evolved multiple mechanisms of  
50 CRISPR-Cas evasion (Borges et al., 2017). Phage-encoded anti-CRISPR proteins that directly  
51 inhibit type I-C, I-D, I-E, I-F, II-A, II-C, and V-A CRISPR-Cas systems have been identified  
52 (Hwang and Maxwell, 2019; Trasanidou et al., 2019). These anti-CRISPRs have distinct protein  
53 sequences, structures, and mechanisms of inactivation. Some anti-CRISPRs block CRISPR-  
54 Cas target DNA binding by steric occlusion and DNA mimicry (Bondy-Denomy et al., 2015;  
55 Dong et al., 2017; Jiang et al., 2019; Liu et al., 2019; Shin et al., 2017; Yang and Patel, 2017),  
56 guide-RNA loading interference (Thavalingam et al., 2019; Zhu et al., 2019), and effector  
57 dimerization (Fuchsbaauer et al., 2019; Harrington et al., 2017; Zhu et al., 2019). Other anti-  
58 CRISPRs prevent DNA cleavage by interacting with the catalytic domain of Cas nucleases  
59 (Bondy-Denomy et al., 2015; Harrington et al., 2017). Anti-CRISPRs that inactivate Type II  
60 CRISPR-Cas systems, which are widely utilized for genome editing applications, have been  
61 extensively characterized in biochemical and heterologous cell-based systems (Bondy-Denomy,  
62 2018; Yao et al., 2018). However, few studies have examined anti-CRISPR functions in the  
63 natural context of phage-bacteria warfare (Hynes et al., 2017, 2018).

64 In the lytic cycle, phage replication causes host cell lysis, whereas in lysogeny,  
65 temperate phages integrate into the bacterial chromosome and become prophages. The  
66 bacterial host and prophage replicate together during lysogeny and prophages can contribute  
67 novel genes that provide fitness benefits or even serve as regulatory switches (Argov et al.,  
68 2017; Bondy-Denomy et al., 2016; Borges et al., 2017; Chen et al., 2005; Feiner et al., 2015). In

69 *Listeria monocytogenes*, some prophages employ “active lysogeny” during mammalian cell  
70 infection, wherein temporary prophage excision from the bacterial chromosome allows  
71 expression of the *comK* gene required for *Listeria* replication in macrophages (Rabinovich et al.,  
72 2012). Prophages also inactivate CRISPR-Cas in *L. monocytogenes* through the expression of  
73 anti-CRISPR proteins (Rauch et al., 2017). In lysogens with CRISPR arrays encoding spacers  
74 that target the prophage (i.e. self-targeting), anti-CRISPRs are essential for host and prophage  
75 survival. Whether anti-CRISPRs play distinct roles during lysogeny or lytic growth when  
76 expressed by temperate phages is unknown.

77 Here, we show that the *Listeria* phage protein AcrIIA1 selectively triggers degradation of  
78 catalytically active Cas9, through a direct interaction between the AcrIIA1<sup>CTD</sup> (C-terminal  
79 domain) unstructured loop and Cas9 HNH domain. AcrIIA1 is sufficient to stabilize CRISPR-  
80 targeted prophages, but is ineffective during lytic replication. This inactivity necessitates the co-  
81 existence of AcrIIA1 with an anti-CRISPR (e.g. AcrIIA2, AcrIIA4, or AcrIIA12, identified here)  
82 that rapidly blocks Cas9 during lytic infection. While highly conserved across AcrIIA1 homologs,  
83 the AcrIIA1<sup>NTD</sup> (N-terminal domain) is completely dispensable for anti-CRISPR activity and is  
84 instead a crucial repressor of *acr* locus transcription, a requirement for optimal phage fitness.

## 85 RESULTS

### 86 AcrIIA1 interacts with Cas9 and triggers its degradation

87 To determine the AcrIIA1 mechanism of action, we first attempted to immunoprecipitate Cas9  
88 from *L. monocytogenes* (*Lmo*10403s) strains, where AcrIIA1 was expressed from one of three  
89 prophages ( $\Phi$ A006,  $\Phi$ A118, and  $\Phi$ J0161a). Surprisingly, upon immunoblotting for Cas9 protein,  
90 we observed highly reduced Cas9 levels in these lysogens (Figure 1A). Transcriptional and  
91 translational reporters revealed that transcript levels were unaffected, while the protein reporter  
92 levels decreased by ~70% (Figure 1A). RT-qPCR experiments confirmed Cas9 mRNA levels  
93 were unaffected in each lysogen (Figure S1A). AcrIIA1 alone, but not AcrIIA4, was sufficient to  
94 mediate decreased Cas9 levels in both reporter and western blot assays (Figure 1B). The well-  
95 studied orthologue, SpyCas9 (53% amino acid identity to LmoCas9), displayed the same post-  
96 transcriptional AcrIIA1-dependent loss of Cas9 when introduced into *L. monocytogenes* (Figure  
97 1B).

98 To assay for a direct interaction *in vitro*, AcrIIA1 and SpyCas9 were purified (LmoCas9 was  
99 insoluble). AcrIIA1 and the SpyCas9-gRNA complex interacted with high affinity ( $K_D = 23 \pm 15$   
100 nM) by microscale thermophoresis (MST), comparable to AcrIIA2b.3 ( $K_D = 20 \pm 11$  nM), a well-



101 characterized Cas9-interactor (Jiang et al., 2019; Liu et al., 2019) (Figure 1C). Additionally,  
102 AcrIIA1 interacted with ApoCas9, unlike AcrIIA2b.3, suggesting a unique binding mechanism  
103 (Figure S1B). Neither binding event was sufficient to degrade Cas9 *in vitro*, nor was the protein  
104 destabilized when subjected to limited proteolysis (Figure S1C). We therefore considered  
105 whether the cellular environment of *L. monocytogenes* stimulates Cas9 degradation when  
106 bound by AcrIIA1. Indeed, we observed an accelerated decay of SpyCas9 protein upon  
107 induction of AcrIIA1 compared to treatment with a translation inhibitor, gentamicin (Figures 1D  
108 and S1D). In contrast, SpyCas9 protein increased over time when AcrIIA1 was not induced;  
109 similar to strains expressing AcrIIA4 or lacking an anti-CRISPR (Figures 1D and S1D).  
110 However, we paradoxically observed that AcrIIA1 did not inhibit catalytically-dead Cas9 (dCas9)  
111 in a CRISPRi assay using Lmo- or Spy- dCas9 engineered to repress RFP expression (Figures  
112 1E and S1F), but did inhibit active Cas9 in an isogenic self-targeting strain (Figure 1F).  
113 Consistent with these findings, lysogens expressing AcrIIA1 or AcrIIA4 alone or together also  
114 revealed no significant decrease in dCas9 levels (Figures 1G and S1H), whereas active Cas9  
115 protein diminished by ~70% in all AcrIIA1-expressing lysogens (Figures 1G, S1G and S1H).  
116 Therefore, AcrIIA1 has a mechanism to detect catalytically active Cas9 protein and trigger its  
117 degradation.

118 Given the discrepant outcomes between Cas9 and dCas9, the ability of AcrIIA1 to bind these  
119 proteins *in vitro* was assessed. AcrIIA1 interacted with dCas9-gRNA ~40-fold weaker ( $K_D = 905$   
120  $\pm 874$  nM) than with Cas9-gRNA (Figures 1C, 1H and S1I). Only two residues differ between  
121 catalytically active Cas9 and dCas9 (D10A and H840A). AcrIIA1 binding to Cas9(D10A) ( $K_D =$   
122  $\sim 38$  nM) was similar to wild-type Cas9 ( $K_D = \sim 23$ , Figure 1), whereas binding to Cas9(H840A)  
123 was ~80-fold weaker ( $K_D = 2 \pm 4$   $\mu$ M) (Figures 1H and S1I). AcrIIA2b.3, which binds the PAM-  
124 interacting domain, displayed no difference in binding affinity to the four Cas9 variants ( $K_D = 18$   
125  $- 38$  nM) (Figures 1H and S1I). Therefore, we conclude that AcrIIA1 triggers the degradation of  
126 catalytically active Cas9 in *L. monocytogenes* through a direct interaction with the Cas9 HNH  
127 domain (where H840 resides).

### 128 **AcrIIA1 protects CRISPR-targeted prophages but fails during lytic replication**

129 Given that AcrIIA1 triggers Cas9 degradation, a mechanism not previously observed for any  
130 anti-CRISPR, we sought to determine when this activity manifests in the phage life cycle.  
131 Isogenic  $\Phi$ A006 phages were engineered to encode no anti-CRISPR, *acrIIA1*, *acrIIA4*, or  
132 *acrIIA1* and *acrIIA4* together, and assessed along with wild-type (WT) phages, during lytic and

133 lysogenic infection. When infecting *Lmo10403s* expressing Cas9 and a native  $\Phi$ A006-targeting  
134 spacer sequence, phages encoding only *acrIIA1* surprisingly failed to replicate, similar to a  $\Delta$ *acr*  
135 phage (efficiency of plaquing, EOP  $\leq 3 \times 10^{-5}$ , Figures 2A and S2A). Phages encoding *acrIIA4*  
136 replicated well (EOP = 0.1 – 0.7, depending on *acrIIA4* expression strength), similar to WT  
137  $\Phi$ A006 (EOP  $\geq 0.7$ ), with no added benefit derived from *acrIIA1* (Figures 2A and S2A). In  
138 contrast, during lysogeny,  $\Phi$ A006 prophages encoding *acrIIA1* completely prevented self-  
139 targeting upon Cas9 induction, whereas lysogens lacking an anti-CRISPR ( $\Delta$ *acr*) died (Figure  
140 2B). The remarkable difference in AcrIIA1 efficacy during lytic and lysogenic growth bolsters a  
141 conclusion that the Cas9 degradative mechanism is optimal for the lysogenic lifestyle, but not  
142 fast enough for inactivation during lytic replication.

143 Given the inability of AcrIIA1 to inhibit Cas9 during lytic infection, phages may need additional  
144 Cas9 inhibitors. Indeed, in 119 *Listeria* prophage genomes analyzed, 77% encode *acrIIA1* with  
145 at least one additional *acrIIA* gene (i.e. *acrIIA2-A4*), 13% possess *acrIIA1* without a known  
146 *acrIIA* neighbor (including WT  $\Phi$ A006), and 10% encode *orfD* (a distant *acrIIA1* orthologue),  
147 along with other uncharacterized ORFs (Rauch et al., 2017). The WT  $\Phi$ A006 phage, which has  
148 *acrIIA1* and no other known *acr*, replicated far better (EOP  $\geq 0.7$ ) than a phage encoding *acrIIA1*  
149 alone, suggesting an additional Cas9 inhibitor in this phage (Figures 2A and S2A). Engineered  
150 phages encoding the gene adjacent to *acrIIA1* restored phage lytic replication (EOP  $\geq 0.5$ ) and  
151 revealed a new anti-CRISPR, AcrIIA12, which also inhibited Lmo (but not Spy) dCas9-based  
152 CRISPRi (Figures 2A, S2A and S2B). Notably, we observed the presence of *acrIIA12* in every  
153 *acr* locus previously reported to encode only *acrIIA1*, indicating that prophages do not encode  
154 *acrIIA1* alone. Therefore, *Listeria* prophages most commonly encode *acrIIA1*, which triggers  
155 Cas9 degradation to ensure stable lysogeny, in combination with a Cas9 interactor that blocks  
156 DNA binding (AcrIIA2, AcrIIA4, or AcrIIA12) for successful lytic replication.

### 157 **AcrIIA1 utilizes an unstructured C-terminal loop to inactivate Cas9**

158 The AcrIIA1 crystal structure revealed a two-domain architecture, with a helix-turn-helix (HTH)-  
159 containing AcrIIA1<sup>NTD</sup> similar to known transcriptional repressors and an extended AcrIIA1<sup>CTD</sup> of  
160 unknown function (Ka et al., 2018). Surprisingly, the AcrIIA1<sup>CTD</sup> was sufficient for anti-CRISPR  
161 function, protection from self-targeting, and triggering Cas9 protein degradation, while the  
162 AcrIIA1<sup>NTD</sup> displayed no evidence of Cas9 regulation (Figures S2C and S2D). To identify AcrIIA1  
163 residues required for anti-CRISPR function, we conducted multi-sequence alignments and used  
164 our previously developed heterologous *P. aeruginosa* anti-SpyCas9 screening platform (Jiang et

165 al., 2019). AcrIIA1 homologs were identified in mobile genetic elements of *Listeria*,  
166 *Enterococcus*, *Lactobacillus*, and *Leuconostoc* species, ranging from 22% to 77% protein  
167 sequence identity (Figures 2C and S4D). Homology was driven by obvious sequence similarity  
168 in the NTD, with CTD conservation in only a subset of proteins. AcrIIA1 homologs with  
169 conserved CTDs displayed anti-SpyCas9 activity (except AcrIIA1<sub>LMO10</sub>), whereas the three  
170 proteins with highly diverged CTDs (including *orfD*) did not (Figures 2D and S3A). Alanine  
171 scanning mutagenesis of the conserved amino acids present in AcrIIA1 homologs identified a  
172 stretch of aromatic and charged residues in an unstructured region of the AcrIIA1<sup>CTD</sup> (P112 to  
173 R117) that were required for complete anti-CRISPR activity (Figures 2E and S3A). Expression  
174 levels of each mutant protein were unperturbed relative to WT AcrIIA1 (Figure S3B). The F115A  
175 mutation completely abolished anti-CRISPR function (Figures 2E and S3A) and the interaction  
176 with Cas9 (Figures 2F and S2F-G). In *Listeria*, AcrIIA1(F115A) and AcrIIA1(T114A/F115A)  
177 mutants failed to protect cells from genomic self-targeting (Figure S2C) and these mutations  
178 either completely (T114A/F115A) or partially (F115A) restored Cas9 protein levels (Figure S2E).

179 When verifying expression of AcrIIA1 mutants, we observed that AcrIIA1-mediated inhibition  
180 does not trigger Cas9 degradation in *P. aeruginosa* (Figure S3B). Yet, similar to in *Listeria*,  
181 AcrIIA1 still displayed robust anti-CRISPR activity, inactivating Cas9 in phage-targeting and self-  
182 targeting experiments, while not interfering with CRISPRi (Figures S3A and S3C). Since AcrIIA1  
183 can apparently inhibit Cas9 without causing degradation, we immunoprecipitated Cas9 bound to  
184 AcrIIA1 or the control AcrIIA4 from *P. aeruginosa* (Figures 2F and S2F) and assessed DNA  
185 cleavage activity *in vitro*. Cas9 was functional when immunoprecipitated alone but inhibited  
186 when co-purified with AcrIIA1 or AcrIIA4 (Figure 2G and S2H). The AcrIIA1 mutants (F115A and  
187 T114A/F115A) interacted with Cas9 very weakly (Figures 2F, S2F-G) and had little impact on  
188 DNA cleavage (Figure S2H). Interestingly, *in vitro* experiments with individually purified proteins  
189 revealed that AcrIIA1 is not sufficient to inhibit Cas9-mediated DNA cleavage (Figure S2I),  
190 despite its strong binding affinity, suggesting an additional cellular factor is required to inactivate  
191 Cas9. This putative multi-step process may explain why inhibition does not manifest  
192 immediately during lytic growth. Therefore, AcrIIA1 utilizes conserved residues in its CTD to  
193 interact with the Cas9 HNH domain, blocking DNA cleavage and triggering Cas9 protein  
194 degradation in *Listeria*. In a foreign host potentially lacking the Cas9-degrading pathway, DNA  
195 cleavage inhibition manifests.

196 **AcrIIA1 is a broad-spectrum Cas9 inhibitor**

197 Given the ability of AcrIIA1 to inactivate Cas9 via recognition of a highly conserved catalytic  
198 residue, we assessed inhibition of diverged Cas9 orthologues. In *Escherichia coli* strains  
199 expressing Type II-A, II-B, and II-C Cas9 proteins (Figure 3A) targeting phage Mu, AcrIIA1  
200 intermediately or completely inhibited four Type II-C (Boe, Hpa, Cje, and Geo) and two Type II-A  
201 (Sau and Spy) Cas9s (Figures 3B and S3D). In contrast, AcrIIA2 only weakly inhibited Hpa and  
202 SpyCas9, while AcrIIA4 only inactivated SpyCas9 (Figure 3B). Considering the biological driver  
203 of broad-spectrum Cas9 inhibition by AcrIIA1, a smaller Type II-A Cas9 (1,078 a.a.) was  
204 recently discovered in *L. ivanovii* (LivCas9) (Hupfeld et al., 2018) with similarities to other small  
205 Cas9 proteins (e.g. SauCas9) and Type II-C orthologues (Figure 3A). In *Listeria* strains  
206 expressing the small LivCas9 variant programmed to target phage  $\Phi$ P35 or  $\Phi$ A511, AcrIIA1  
207 inhibited LivCas9 (Figures 3C and S3E). Thus, AcrIIA1 displays broad-spectrum activity against  
208 diverged Cas9 nucleases, whereas the well-characterized DNA binding inhibitors, AcrIIA2 and  
209 AcrIIA4, are much narrower in their inhibitory spectrum. This broad-spectrum inhibition also  
210 likely explains the utility of AcrIIA1 to phages infecting *Listeria*, where two distinct Cas9  
211 orthologues are encountered.

212 The robust AcrIIA1 activity observed in various heterologous hosts led us to assess inhibition of  
213 Cas9 gene editing in human cells. We employed a deep sequencing-based approach to  
214 improve the dynamic range of edit detection, in comparison to our previous GFP-disruption  
215 assay (Rauch et al., 2017). HEK 293T cells were co-transfected with plasmids encoding *acrIIA1*,  
216 *cas9*, and sgRNAs targeting endogenous human sequences and editing efficacy was evaluated  
217 after 3 days. AcrIIA1 blocked the gene editing activity of SpyCas9 by 50-70% and of CjeCas9,  
218 SauCas9, St3Cas9, and NmeCas9 moderately, whereas AcrIIA4 only inhibited SpyCas9  
219 (Figures 3D and S3E). Thus, AcrIIA1 inactivates diverse Cas9 orthologues in many  
220 heterologous systems, including bacteria (*L. monocytogenes*, *P. aeruginosa*, *E. coli*), yeast  
221 (Nakamura et al., 2019), and human cells, providing a genome editing modulator that  
222 specifically prevents Cas9 DNA cleavage. Future work is needed to enhance its efficiency,  
223 however.

#### 224 ***acr* locus repression by AcrIIA1<sup>NTD</sup> promotes general lytic growth and prophage induction**

225 While interrogating the requirements for anti-CRISPR function, we observed that two  
226 engineered phages with deletions in their anti-CRISPR locus ( $\Phi$ A006 $\Delta$ *acr* and  
227  $\Phi$ J0161a $\Delta$ *acrIIA1-2*) displayed a Cas9-independent lytic growth defect (Figure 4A). This defect  
228 was rescued by the provision of *acrIIA1*<sup>NTD</sup> in *trans* or by engineering an  $\Phi$ A006 phage to

229 express only the *acrIIA1*<sup>NTD</sup> (Figure 4A). Moreover, all engineered  $\Phi$ A006 phages expressing an  
230 anti-CRISPR (e.g. *acrIIA1*<sup>CTD</sup>, *acrIIA4*, *acrIIA12*) without the *acrIIA1*<sup>NTD</sup> displayed a decrease in  
231 phage titer (PFU/mL) that was restored by *acrIIA1*<sup>NTD</sup> *trans*- or *cis*-complementation (Figure 4A).  
232 The phage expressing only *acrIIA1*<sup>CTD</sup> (only observed fused to *acrIIA1*<sup>NTD</sup> in genomes) displayed  
233 the strongest lytic defect amongst the  $\Phi$ A006 phages, while simply separating the two AcrIIA1  
234 domains had no deleterious effect (Figure 4A).  $\Phi$ J0161a $\Delta$ *acrIIA1-2* had the most drastic lytic  
235 defect, failing to replicate unless complemented in *trans* with the *acrIIA1*<sup>NTD</sup> (Figure 4A).  
236 Moreover, the  $\Phi$ J0161a $\Delta$ *acrIIA1-2* prophage displayed a Cas9-independent prophage induction  
237 deficiency, yielding 25-fold less phage during mitomycin C induction, compared to the WT  
238 prophage or the *acrIIA1*-complemented mutant (Figure 4B). Attempts to efficiently induce  
239  $\Phi$ A006 prophages were unsuccessful, as previously observed (Loessner, 1991; Loessner et al.,  
240 1991). Therefore, aside from acting as an anti-CRISPR, AcrIIA1 plays an important Cas9-  
241 independent role in the phage life cycle, promoting optimal lytic replication and lysogenic  
242 induction.

243 AcrIIA1<sup>NTD</sup> contains an HTH motif with strong similarity to transcriptional repressors (Ka et al.,  
244 2018). Due to the Cas9-independent growth defects described above, we considered whether  
245 regulation of the anti-CRISPR locus is required. Alignments of the anti-CRISPR promoters of  
246  $\Phi$ A006,  $\Phi$ J0161, and  $\Phi$ A118 revealed a highly conserved palindromic sequence (Figures 4C  
247 and S4A). An RFP transcriptional reporter assay showed that full-length AcrIIA1 and AcrIIA1<sup>NTD</sup>,  
248 but not AcrIIA1<sup>CTD</sup>, repress the  $\Phi$ A006 anti-CRISPR promoter (Figure 4E, left). *In vitro* MST  
249 binding assays confirmed that AcrIIA1 ( $K_D = 26 \pm 10$  nM) or AcrIIA1<sup>NTD</sup> ( $K_D = 28 \pm 3$  nM) bind the  
250 anti-CRISPR promoter with high affinity (Figures 4D and S4B). Moreover, mutagenesis of the  
251 palindromic sequence prevented AcrIIA1-mediated repression of the  $\Phi$ A006 anti-CRISPR  
252 promoter (Figure 4E, right) and abolished promoter binding *in vitro* (Figure 4D). Alanine  
253 scanning mutagenesis of conserved residues predicted to be important for DNA binding and  
254 dimerization (Ka et al., 2018) identified AcrIIA1<sup>NTD</sup> residues L10, T16, and R48 as critical for  
255 transcriptional repression, whereas AcrIIA1<sup>CTD</sup> mutations had little effect (Figure 4F). Finally, we  
256 observed that Cas9 degradation induced by prophage-expressed AcrIIA1 in *L. monocytogenes*  
257 (Figure 1A) could be prevented by AcrIIA1<sup>NTD</sup> overexpression, due to repression of the anti-  
258 CRISPR locus (Figure 4G). Thus, the AcrIIA1<sup>NTD</sup>-HTH domain represses anti-CRISPR  
259 transcription through a highly conserved operator, which is required for optimal phage fitness.

260 **Transcriptional autoregulation is a general feature of the AcrIIA1 superfamily**



261 Recent studies have reported transcriptional autoregulation of anti-CRISPR loci by HTH-  
262 proteins in phages that infect Gram-negative *Proteobacteria*, as a mechanism to limit excessive  
263 transcription and downstream transcriptional conflict (Birkholz et al., 2019; Stanley et al., 2019).  
264 To determine whether anti-CRISPR locus regulation is similarly pervasive amongst mobile  
265 genetic elements in the Gram-positive *Firmicutes* phylum, we assessed AcrIIA1 homologs for  
266 transcriptional repression of their predicted cognate promoters and our model  $\Phi$ A006 phage  
267 promoter. Homologs sharing amino acid sequence identity from 21% (i.e. OrfD) to 72% with  
268 AcrIIA1<sup>NTD</sup> were selected from *Listeria*, *Enterococcus*, *Leuconostoc*, and *Lactobacillus* (Figure  
269 4H and S4D). All AcrIIA1 homologs repressed transcription of their cognate promoters by 42-  
270 99%, except AcrIIA1 from *Lactobacillus parabuchneri*, where promoter expression was  
271 undetectable in a foreign host (Figures 4H and S4C). Strong repression of the model  $\Phi$ A006  
272 promoter was seen by *Listeria* orthologues possessing  $\geq 68\%$  protein sequence identity (Figure  
273 4H). Likewise, AcrIIA1 <sub>$\Phi$ A006</sub> repressed the promoters of AcrIIA1 orthologues that repressed the  
274  $\Phi$ A006 promoter (Figure 4I). Interestingly, the AcrIIA1<sub>LMO10</sub> homolog, which previously displayed  
275 no anti-CRISPR activity despite possessing 85% AcrIIA1<sup>CTD</sup> sequence identity (Figures 2D and  
276 S3A), contains an AcrIIA1<sup>NTD</sup> palindromic binding site overlapping its protein-coding sequence.  
277 AcrIIA1<sub>LMO10</sub> anti-CRISPR function manifested when the AcrIIA1<sup>NTD</sup> binding site was disrupted  
278 with silent mutations (Figure S3A). Altogether, these findings demonstrate that the anti-CRISPR  
279 promoter-AcrIIA1<sup>NTD</sup> repressor relationship is highly conserved.

### 280 **Host-encoded AcrIIA1<sup>NTD</sup> blocks phage anti-CRISPR deployment**

281 Given that the AcrIIA1<sup>NTD</sup> represses anti-CRISPR transcription, we wondered whether bacteria  
282 could co-opt this activity and manifest it in *trans*, inhibiting a phage from deploying its anti-  
283 CRISPR arsenal. We observed that  $\Phi$ A006-derived phages encoding anti-CRISPRs were  
284 rendered vulnerable to Cas9 targeting when the host expressed anti-CRISPR-deficient AcrIIA1  
285 mutants or AcrIIA1<sup>NTD</sup> (Figure 5A). A panel of distinct anti-CRISPR-encoding phages also  
286 became vulnerable to Cas9 targeting when AcrIIA1<sup>NTD</sup> was expressed from a plasmid (Figure  
287 5B) or from an integrated single-copy *acrIIA1<sup>NTD</sup>* driven by a prophage promoter (Figure S5A).  
288 Each of these phages possesses complete or partial spacer matches to the *Lmo10403s*  
289 CRISPR array. In contrast, replication of the non-targeted phage,  $\Phi$ J0161a, was unperturbed  
290 (Figure 5B). This demonstrates that host or mobile elements can use this repressor as an “anti-  
291 anti-CRISPR” to block anti-CRISPR synthesis, which may be particularly advantageous, if  
292 infecting phages encode other anti-CRISPR proteins (e.g. against the *Listeria* Type I-B  
293 CRISPR-Cas system).

294 The widespread prevalence of AcrIIA1 is driven by AcrIIA1<sup>NTD</sup>, with orthologues in many  
295 *Firmicutes* including *Enterococcus*, *Bacillus*, *Clostridium*, and *Streptococcus*. The AcrIIA1<sup>NTD</sup>  
296 can be found either without a CTD or with a distinct CTD sequence. Diverged AcrIIA1<sup>CTDs</sup> may  
297 represent novel anti-CRISPRs, inhibiting CRISPR-Cas systems in their respective hosts. In  
298 *Lactobacillus* sp., for example, there are full-length prophage proteins that lacked anti-SpyCas9  
299 function and contain a novel AcrIIA1<sup>CTD</sup> (Figures 2C, 2D and S3A). In other instances, core  
300 bacterial genomes encode AcrIIA1<sup>NTD</sup> orthologues that are short ~70-80 amino acid proteins  
301 possessing only the HTH domain. In particular, *Lactobacillus delbrueckii* strains contain an  
302 AcrIIA1<sup>NTD</sup> homolog (35% identical, 62% similar to AcrIIA1<sub>ΦA006</sub>) with key residues conserved  
303 (e.g. L10 and T16). Although there are no known *Lactobacillus* phages that express anti-  
304 CRISPRs, this bacterial *acrIIA1<sup>NTD</sup>* gene may perform an “anti-anti-CRISPR” function.  
305 Remarkably, we observe that this AcrIIA1<sup>NTD</sup> homolog is always a genomic neighbor of either  
306 the Type I-E, I-C, or II-A CRISPR-Cas systems in *L. delbrueckii* (Figure 5C). This association is  
307 supportive of a role that enables these CRISPR-Cas systems to function by repressing the  
308 deployment of phage inhibitors against each system. The functions of these diverse AcrIIA1  
309 orthologues found in different bacteria, many of which act as transcriptional repressors (Figure  
310 4H), remain to be elucidated.

## 311 DISCUSSION

312 *Listeria* temperate phages commonly encode the multifunctional AcrIIA1 protein for  
313 protection against CRISPR-Cas and autorepression of anti-CRISPR transcription. The broad-  
314 spectrum AcrIIA1 is sufficient for Cas9 inactivation during lysogeny, but a nonfunctional anti-  
315 CRISPR during lytic growth, perhaps due to slow kinetics of Cas9 cleavage inhibition or  
316 degradation. Thus, AcrIIA1 always coexists with a distinct anti-Cas9 protein (e.g. AcrIIA2,  
317 AcrIIA4, AcrIIA12) that is much narrower in its inhibitory spectrum, but rapidly inactivates Cas9  
318 during lytic replication. Therefore, *Listeria* temperate phages have evolved multiple anti-  
319 CRISPRs with distinct Cas9 binding sites and inactivation mechanisms because they  
320 synergistically grant unique advantages in each stage of the temperate phage life cycle (see  
321 model, Figure 6). While “partner” proteins AcrIIA4 and AcrIIA12 also protected CRISPR-targeted  
322 prophages, only AcrIIA1 triggered Cas9 degradation, presumably enhancing the likelihood of  
323 long-term stability in lysogeny. *Listeria* lysogens were devoid of Cas9 even when *acrIIA1* was  
324 co-encoded with other *acrs*, supporting that Cas9 degradation is the dominant inactivation  
325 mechanism in lysogeny. Given that Cas9 is required for selection of functional spacers by

326 recognizing the correct PAM (Heler et al., 2015), eliminating this nuclease could also prevent  
327 acquisition of lethal self-targeting spacers.

328 Notably, this is the first report of an anti-CRISPR that reduces Cas protein levels and is  
329 also the first with an additional role integral to the phage life cycle. The highly conserved  
330 AcrIIA1<sup>NTD</sup> plays a general Cas9-independent role by autorepressing *acr* locus transcription to  
331 promote phage lytic growth and prophage induction. Engineered phages expressing the  
332 AcrIIA1<sup>CTD</sup> alone had a strong lytic growth defect, perhaps suggesting the AcrIIA1 domains are  
333 fused in nature to limit expression of an otherwise problematic anti-CRISPR. Interestingly, when  
334 the bacterial host expresses AcrIIA1<sup>NTD</sup>, an “anti-anti-CRISPR” activity manifests, blocking anti-  
335 CRISPR expression from infecting or integrated phages. Thus, the importance of the conserved  
336 anti-CRISPR locus repression mechanism may represent a weakness that can be exploited by  
337 the host through the co-opting of this anti-CRISPR regulator.

338 Many diverse Cas9 orthologues have been identified and AcrIIA1 can inhibit highly  
339 distinct II-A and II-C subtypes. This provides a unique advantage to *Listeria* phages, inhibiting a  
340 small LivCas9 variant (25% amino acid identity to large LmoCas9) that is also found in *L.*  
341 *monocytogenes* strains. LivCas9 also shares similarity with Type II-C Cas9s, likely explaining  
342 the biological basis of AcrIIA1 activity against the II-C subtypes. Broad-spectrum inhibition by  
343 AcrIIA1 is likely due to targeting the highly conserved Cas9 HNH domain catalytic site, whereas  
344 the DNA binding inhibitors (AcrIIA2, AcrIIA4, AcrIIA12) are far more limited. AcrIIC1 was  
345 similarly reported to block various Type II-C orthologues by directly binding Cas9 (Apo or gRNA-  
346 bound) via the HNH domain (Harrington et al., 2017). Much like AcrIIA1, AcrIIC1 binds the  
347 NmeCas9 HNH domain with strong affinity ( $K_D = 6.3$  nM; Harrington et al., 2017), but it is a  
348 rather weak anti-CRISPR in comparison to the DNA binding inhibitors AcrIIC3-5, which have  
349 narrow inhibitory spectrums (Lee et al., 2018; Mathony et al., 2019). Therefore, although Cas9  
350 DNA cleavage inhibitors may tend to be weaker anti-CRISPRs, they considerably bolster the  
351 phage defense arsenal by targeting a highly conserved, and potentially immutable feature  
352 amongst bacterial Cas nucleases. Future engineering of AcrIIA1 could generate a more potent  
353 inhibitor, as recently achieved with AcrIIC1 (Mathony et al., 2019). Our attempt to increase anti-  
354 CRISPR function in human cells by weakening DNA interactions (AcrIIA1(T16A) mutant, Figure  
355 3D) was only modestly successful.

356 Widespread AcrIIA1<sup>NTD</sup> conservation also raises the possibility that prophages use this  
357 domain to combat phage superinfection, benefitting both the prophage and host cell. Precedent  
358 for phage repressors acting in this manner, both in *cis* and in *trans*, is strong. For example, the  
359 phage lambda *cl* protein represses prophage lytic genes and prevents superinfection by related



360 phages during lysogeny (Johnson et al., 1981). Similarly, lysogens could use AcrIIA1 to temper  
361 expression of the prophage anti-CRISPR locus while bolstering the activity of a second  
362 CRISPR-Cas system (e.g. Type I-B, which is common in *Listeria*), by preventing incoming  
363 phages from expressing their anti-CRISPRs. Given the diversity of anti-CRISPR protein  
364 sequences, blocking transcription would be a much more effective strategy than inhibiting  
365 individual anti-CRISPRs. Lastly, the widespread nature of the AcrIIA1<sup>NTD</sup>, its fusion to distinct  
366 CTDs, and its shared genetic neighborhood with mechanistically distinct anti-CRISPRs, may be  
367 a useful marker for future *acr* discovery.

### 368 **AUTHOR CONTRIBUTIONS**

369 B.A.O. and J.B.-D. conceived and designed the study. B.A.O., S.Ka., C.M., K.A.C., B.G., and  
370 S.Ki. performed experiments. A.R.D., B.P.K., S.Ki., and J.B.-D. supervised experiments. All  
371 authors evaluated results. B.A.O. and J.B.-D. wrote the manuscript with input from all authors.

### 372 **ACKNOWLEDGEMENTS**

373 We would like to thank Daniel A. Portnoy (UC Berkeley) for providing the pLMB3C-pRhamnose  
374 plasmid, Jennifer A. Doudna for Cas9 expression plasmids (UC Berkeley), and Jonathan Asfaha  
375 (David Morgan Lab, UCSF) and Ujjwal Rathore (Alex Marson Lab, UCSF) for experimental  
376 advice and reagents. The J.B.-D lab was supported by the UCSF Program for Breakthrough  
377 Biomedical Research funded in part by the Sandler Foundation, the Searle Fellowship, the  
378 Vallee Foundation, an NIH Director's Early Independence Award DP5-OD021344, and  
379 R01GM127489; S.Ki. by an Ambizione Fellowship (Swiss National Science Foundation,  
380 SNF\_174108); the B.P.K. lab by NIH R00-CA218870 and P01-HL142494, an A.S.G.C.T. Career  
381 Development Award, and the Margaret Q. Landenberger Research Foundation; and the A.R.D.  
382 lab by a CIHR Foundation grant FDN-15427.

### 383 **COMPETING INTERESTS**

384 J.B.-D. is a scientific advisory board member of SNIPR Biome and Excision Biotherapeutics and  
385 a scientific advisory board member and co-founder of Acrigen Biosciences. B.P.K. is an inventor  
386 on various patents and patent applications that describe gene editing and epigenetic editing  
387 technologies, and consults for Avectas Inc.

388 **REFERENCES**

- 389 Argov, T., Azulay, G., Pasechnek, A., Stadnyuk, O., Ran-Sapir, S., Borovok, I., Sigal, N., and  
390 Herskovits, A.A. (2017). Temperate bacteriophages as regulators of host behavior. *Curr. Opin.*  
391 *Microbiol.* **38**, 81–87.
- 392 Beasley, S.S., Takala, T.M., Reunanen, J., Apajalahti, J., and Saris, P.E.J. (2004).  
393 Characterization and Electrotransformation of *Lactobacillus Crispatus* Isolated from Chicken  
394 Crop and Intestine. *Poult. Sci.* **83**, 45–48.
- 395 Birkholz, N., Fagerlund, R.D., Smith, L.M., Jackson, S.A., and Fineran, P.C. (2019). The  
396 autoregulator *Aca2* mediates anti-CRISPR repression. *Nucleic Acids Res.*
- 397 Bondy-Denomy, J. (2018). Protein Inhibitors of CRISPR-Cas9. *ACS Chem. Biol.* **13**, 417–423.
- 398 Bondy-Denomy, J., Garcia, B., Strum, S., Du, M., Rollins, M.F., Hidalgo-Reyes, Y., Wiedenheft,  
399 B., Maxwell, K.L., and Davidson, A.R. (2015). Multiple mechanisms for CRISPR-Cas inhibition  
400 by anti-CRISPR proteins. *Nature* **526**, 136–139.
- 401 Bondy-Denomy, J., Qian, J., Westra, E.R., Buckling, A., Guttman, D.S., Davidson, A.R., and  
402 Maxwell, K.L. (2016). Prophages mediate defense against phage infection through diverse  
403 mechanisms. *ISME J.* **10**, 2854–2866.
- 404 Borges, A.L., Davidson, A.R., and Bondy-Denomy, J. (2017). The Discovery, Mechanisms, and  
405 Evolutionary Impact of Anti-CRISPRs. *Annu. Rev. Virol.* **4**.
- 406 Borges, A.L., Zhang, J.Y., Rollins, M.F., Osuna, B.A., Wiedenheft, B., and Bondy-Denomy, J.  
407 (2018). Bacteriophage Cooperation Suppresses CRISPR-Cas3 and Cas9 Immunity. *Cell* **174**,  
408 917-925.e10.
- 409 Brouns, S.J.J., Jore, M.M., Lundgren, M., Westra, E.R., Slijkhuis, R.J.H., Snijders, A.P.L.,  
410 Dickman, M.J., Makarova, K.S., Koonin, E.V., and Oost, J. van der (2008). Small CRISPR  
411 RNAs Guide Antiviral Defense in Prokaryotes. *Science* **321**, 960–964.
- 412 Chen, Y., Golding, I., Sawai, S., Guo, L., and Cox, E.C. (2005). Population Fitness and the  
413 Regulation of *Escherichia coli* Genes by Bacterial Viruses. *PLoS Biol.* **3**.
- 414 Choi, K.-H., Kumar, A., and Schweizer, H.P. (2006). A 10-min method for preparation of highly  
415 electrocompetent *Pseudomonas aeruginosa* cells: Application for DNA fragment transfer  
416 between chromosomes and plasmid transformation. *J. Microbiol. Methods* **64**, 391–397.
- 417 Clement, K., Rees, H., Canver, M.C., Gehrke, J.M., Farouni, R., Hsu, J.Y., Cole, M.A., Liu, D.R.,  
418 Joung, J.K., Bauer, D.E., et al. (2019). CRISPResso2 provides accurate and rapid genome  
419 editing sequence analysis. *Nat. Biotechnol.* **37**, 224–226.
- 420 Deltcheva, E., Chylinski, K., Sharma, C.M., Gonzales, K., Chao, Y., Pirzada, Z.A., Eckert, M.R.,  
421 Vogel, J., and Charpentier, E. (2011). CRISPR RNA maturation by trans-encoded small RNA  
422 and host factor RNase III. *Nature* **471**, 602–607.
- 423 Dong, D., Guo, M., Wang, S., Zhu, Y., Wang, S., Xiong, Z., Yang, J., Xu, Z., and Huang, Z.  
424 (2017). Structural basis of CRISPR–SpyCas9 inhibition by an anti-CRISPR protein. *Nature* **546**,  
425 436–439.

- 426 Estela, L.A., Sofos, J.N., and Flores, B.B. (1992). Bacteriophage Typing of *Listeria*  
427 *monocytogenes* Cultures Isolated From Seafoods. *J. Food Prot.* *55*, 13–17.
- 428 Feiner, R., Argov, T., Rabinovich, L., Sigal, N., Borovok, I., and Herskovits, A.A. (2015). A new  
429 perspective on lysogeny: prophages as active regulatory switches of bacteria. *Nat. Rev.*  
430 *Microbiol.* *13*, 641–650.
- 431 Fieseler, L., Schmitter, S., Teiserskas, J., and Loessner, M.J. (2012). Rhamnose-Inducible  
432 Gene Expression in *Listeria monocytogenes*. *PLOS ONE* *7*, e43444.
- 433 Fuchsbauer, O., Swuec, P., Zimberger, C., Amigues, B., Levesque, S., Agudelo, D., Durringer,  
434 A., Chaves-Sanjuan, A., Spinelli, S., Rousseau, G.M., et al. (2019). Cas9 Allosteric Inhibition by  
435 the Anti-CRISPR Protein AcrIIA6. *Mol. Cell. Manuscript under review.*
- 436 Garcia, B., Lee, J., Edraki, A., Hidalgo-Reyes, Y., Erwood, S., Mir, A., Trost, C., Seroussi, U.,  
437 Stanley, S.Y., Cohn, R.D., et al. (2019). One Anti-CRISPR to Rule Them All: Potent Inhibition of  
438 Cas9 Homologs Used for Genome Editing. *Cell Rep. Manuscript under review.*
- 439 Garneau, J.E., Dupuis, M.-È., Villion, M., Romero, D.A., Barrangou, R., Boyaval, P., Fremaux,  
440 C., Horvath, P., Magadán, A.H., and Moineau, S. (2010). The CRISPR/Cas bacterial immune  
441 system cleaves bacteriophage and plasmid DNA. *Nature* *468*, 67–71.
- 442 Harrington, L.B., Doxzen, K.W., Ma, E., Liu, J.-J., Knott, G.J., Edraki, A., Garcia, B., Amrani, N.,  
443 Chen, J.S., Cofsky, J.C., et al. (2017). A Broad-Spectrum Inhibitor of CRISPR-Cas9. *Cell* *170*,  
444 1224-1233.e15.
- 445 Haurwitz, R.E., Jinek, M., Wiedenheft, B., Zhou, K., and Doudna, J.A. (2010). Sequence- and  
446 Structure-Specific RNA Processing by a CRISPR Endonuclease. *Science* *329*, 1355–1358.
- 447 Heler, R., Samai, P., Modell, J.W., Weiner, C., Goldberg, G.W., Bikard, D., and Marraffini, L.A.  
448 (2015). Cas9 specifies functional viral targets during CRISPR–Cas adaptation. *Nature* *519*,  
449 199–202.
- 450 Hoang, T.T., Kutchma, A.J., Becher, A., and Schweizer, H.P. (2000). Integration-Proficient  
451 Plasmids for *Pseudomonas aeruginosa*: Site-Specific Integration and Use for Engineering of  
452 Reporter and Expression Strains. *Plasmid* *43*, 59–72.
- 453 Hupfeld, M., Trasanidou, D., Ramazzini, L., Klumpp, J., Loessner, M.J., and Kilcher, S. (2018).  
454 A functional type II-A CRISPR–Cas system from *Listeria* enables efficient genome editing of  
455 large non-integrating bacteriophage. *Nucleic Acids Res.* *46*, 6920–6933.
- 456 Hurst, C.J., Blannon, J.C., Hardaway, R.L., and Jackson, W.C. (1994). Differential Effect of  
457 Tetrazolium Dyes upon Bacteriophage Plaque Assay Titers. *Appl. Environ. Microbiol.* *60*, 3462.
- 458 Hwang, S., and Maxwell, K.L. (2019). Meet the Anti-CRISPRs: Widespread Protein Inhibitors of  
459 CRISPR-Cas Systems. *CRISPR J.* *2*, 23–30.
- 460 Hynes, A.P., Rousseau, G.M., Lemay, M.-L., Horvath, P., Romero, D.A., Fremaux, C., and  
461 Moineau, S. (2017). An anti-CRISPR from a virulent streptococcal phage inhibits *Streptococcus*  
462 *pyogenes* Cas9. *Nat. Microbiol.* *2*, 1374.

- 463 Hynes, A.P., Rousseau, G.M., Agudelo, D., Goulet, A., Amigues, B., Loehr, J., Romero, D.A.,  
464 Fremaux, C., Horvath, P., Doyon, Y., et al. (2018). Widespread anti-CRISPR proteins in virulent  
465 bacteriophages inhibit a range of Cas9 proteins. *Nat. Commun.* **9**, 1–10.
- 466 Jiang, F., Liu, J.-J., Osuna, B.A., Xu, M., Berry, J.D., Rauch, B.J., Nogales, E., Bondy-Denomy,  
467 J., and Doudna, J.A. (2019). Temperature-Responsive Competitive Inhibition of CRISPR-Cas9.  
468 *Mol. Cell* **73**, 601-610.e5.
- 469 Johnson, A.D., Poteete, A.R., Lauer, G., Sauer, R.T., Ackers, G.K., and Ptashne, M. (1981).  $\lambda$   
470 Repressor and *cro*—components of an efficient molecular switch. *Nature* **294**, 217–223.
- 471 Ka, D., An, S.Y., Suh, J.-Y., and Bae, E. (2018). Crystal structure of an anti-CRISPR protein,  
472 AcrIIA1. *Nucleic Acids Res.* **46**, 485–492.
- 473 Kilcher, S., Studer, P., Muessner, C., Klumpp, J., and Loessner, M.J. (2018). Cross-genus  
474 rebooting of custom-made, synthetic bacteriophage genomes in L-form bacteria. *Proc. Natl.*  
475 *Acad. Sci.* **115**, 567–572.
- 476 Kleinstiver, B.P., Sousa, A.A., Walton, R.T., Tak, Y.E., Hsu, J.Y., Clement, K., Welch, M.M.,  
477 Horng, J.E., Malagon-Lopez, J., Scarfò, I., et al. (2019). Engineered CRISPR–Cas12a variants  
478 with increased activities and improved targeting ranges for gene, epigenetic and base editing.  
479 *Nat. Biotechnol.* **37**, 276–282.
- 480 Koonin, E.V., Makarova, K.S., and Zhang, F. (2017). Diversity, classification and evolution of  
481 CRISPR-Cas systems. *Curr. Opin. Microbiol.* **37**, 67–78.
- 482 Lauer, P., Chow, M.Y.N., Loessner, M.J., Portnoy, D.A., and Calendar, R. (2002). Construction,  
483 Characterization, and Use of Two *Listeria monocytogenes* Site-Specific Phage Integration  
484 Vectors. *J. Bacteriol.* **184**, 4177–4186.
- 485 Lee, J., Mir, A., Edraki, A., Garcia, B., Amrani, N., Lou, H.E., Gainetdinov, I., Pawluk, A.,  
486 Ibraheim, R., Gao, X.D., et al. (2018). Potent Cas9 Inhibition in Bacterial and Human Cells by  
487 AcrIIC4 and AcrIIC5 Anti-CRISPR Proteins. *MBio* **9**, e02321-18.
- 488 Liu, L., Yin, M., Wang, M., and Wang, Y. (2019). Phage AcrIIA2 DNA Mimicry: Structural Basis  
489 of the CRISPR and Anti-CRISPR Arms Race. *Mol. Cell* **73**, 611-620.e3.
- 490 Loessner, M.J. (1991). Improved procedure for bacteriophage typing of *Listeria* strains and  
491 evaluation of new phages. *Appl. Environ. Microbiol.* **57**, 882–884.
- 492 Loessner, M.J., Goepl, S., and Busse, M. (1991). Comparative inducibility of bacteriophage in  
493 naturally lysogenic and lysogenized strains of *Listeria* spp. by u.v. light and Mitomycin C. *Lett.*  
494 *Appl. Microbiol.* **12**, 196–199.
- 495 Makarova, K.S., Wolf, Y.I., Alkhnbashi, O.S., Costa, F., Shah, S.A., Saunders, S.J., Barrangou,  
496 R., Brouns, S.J.J., Charpentier, E., Haft, D.H., et al. (2015). An updated evolutionary  
497 classification of CRISPR-Cas systems. *Nat. Rev. Microbiol.* **13**, 722–736.
- 498 Mathony, J., Hartevelde, Z., Schmelas, C., Belzen, J.U. zu, Aschenbrenner, S., Hoffmann, M.D.,  
499 Stengl, C., Scheck, A., Rosset, S., Grimm, D., et al. (2019). Computational design of anti-  
500 CRISPR proteins with improved inhibition potency and expanded specificity. *BioRxiv* 685032.

- 501 Mojica, F.J.M., Díez-Villaseñor, C., García-Martínez, J., and Soria, E. (2005). Intervening  
502 Sequences of Regularly Spaced Prokaryotic Repeats Derive from Foreign Genetic Elements. *J.*  
503 *Mol. Evol.* *60*, 174–182.
- 504 Nakamura, M., Srinivasan, P., Chavez, M., Carter, M.A., Dominguez, A.A., Russa, M.L., Lau,  
505 M.B., Abbott, T.R., Xu, X., Zhao, D., et al. (2019). Anti-CRISPR-mediated control of gene editing  
506 and synthetic circuits in eukaryotic cells. *Nat. Commun.* *10*, 1–11.
- 507 Nuñez, J.K., Kranzusch, P.J., Noeske, J., Wright, A.V., Davies, C.W., and Doudna, J.A. (2014).  
508 Cas1–Cas2 complex formation mediates spacer acquisition during CRISPR–Cas adaptive  
509 immunity. *Nat. Struct. Mol. Biol.* *21*, 528–534.
- 510 Park, S.F., and Stewart, G.S.A.B. (1990). High-efficiency transformation of *Listeria*  
511 monocytogenes by electroporation of penicillin-treated cells. *Gene* *94*, 129–132.
- 512 Rabinovich, L., Sigal, N., Borovok, I., Nir-Paz, R., and Herskovits, A.A. (2012). Prophage  
513 Excision Activates *Listeria* Competence Genes that Promote Phagosomal Escape and  
514 Virulence. *Cell* *150*, 792–802.
- 515 Rauch, B.J., Silvis, M.R., Hultquist, J.F., Waters, C.S., McGregor, M.J., Krogan, N.J., and  
516 Bondy-Denomy, J. (2017). Inhibition of CRISPR-Cas9 with Bacteriophage Proteins. *Cell* *168*,  
517 150-158.e10.
- 518 Shin, J., Jiang, F., Liu, J.-J., Bray, N.L., Rauch, B.J., Baik, S.H., Nogales, E., Bondy-Denomy,  
519 J., Corn, J.E., and Doudna, J.A. (2017). Disabling Cas9 by an anti-CRISPR DNA mimic. *Sci.*  
520 *Adv.* *3*.
- 521 Simon, R., Priefer, U., and Pühler, A. (1983). A Broad Host Range Mobilization System for In  
522 Vivo Genetic Engineering: Transposon Mutagenesis in Gram Negative Bacteria. *Bio/Technology*  
523 *1*, 784–791.
- 524 Stanley, S.Y., Borges, A.L., Chen, K.-H., Swaney, D.L., Krogan, N.J., Bondy-Denomy, J., and  
525 Davidson, A.R. (2019). Anti-CRISPR-Associated Proteins Are Crucial Repressors of Anti-  
526 CRISPR Transcription. *Cell* *0*.
- 527 Thavalingam, A., Cheng, Z., Garcia, B., Huang, X., Shah, M., Sun, W., Wang, M., Harrington,  
528 L., Hwang, S., Hidalgo-Reyes, Y., et al. (2019). Inhibition of CRISPR-Cas9 ribonucleoprotein  
529 complex assembly by anti-CRISPR AcrIIc2. *Nat. Commun.* *10*, 1–11.
- 530 Trasanidou, D., Gerós, A.S., Mohanraju, P., Nieuwenweg, A.C., Nobrega, F.L., and Staals,  
531 R.H.J. (2019). Keeping crspr in check: diverse mechanisms of phage-encoded anti-crisprs.  
532 *FEMS Microbiol. Lett.* *366*.
- 533 Yang, H., and Patel, D.J. (2017). Inhibition Mechanism of an Anti-CRISPR Suppressor AcrIIA4  
534 Targeting SpyCas9. *Mol. Cell* *67*, 117-127.e5.
- 535 Yao, R., Liu, D., Jia, X., Zheng, Y., Liu, W., and Xiao, Y. (2018). CRISPR-Cas9/Cas12a  
536 biotechnology and application in bacteria. *Synth. Syst. Biotechnol.* *3*, 135–149.
- 537 Yosef, I., Goren, M.G., and Qimron, U. (2012). Proteins and DNA elements essential for the  
538 CRISPR adaptation process in *Escherichia coli*. *Nucleic Acids Res.* *40*, 5569–5576.

539 Zhu, Y., Gao, A., Zhan, Q., Wang, Y., Feng, H., Liu, S., Gao, G., Serganov, A., and Gao, P.  
540 (2019). Diverse Mechanisms of CRISPR-Cas9 Inhibition by Type IIC Anti-CRISPR Proteins.  
541 *Mol. Cell* 74, 296-309.e7.

542 **FIGURES AND FIGURE LEGENDS**

543 (see next page)



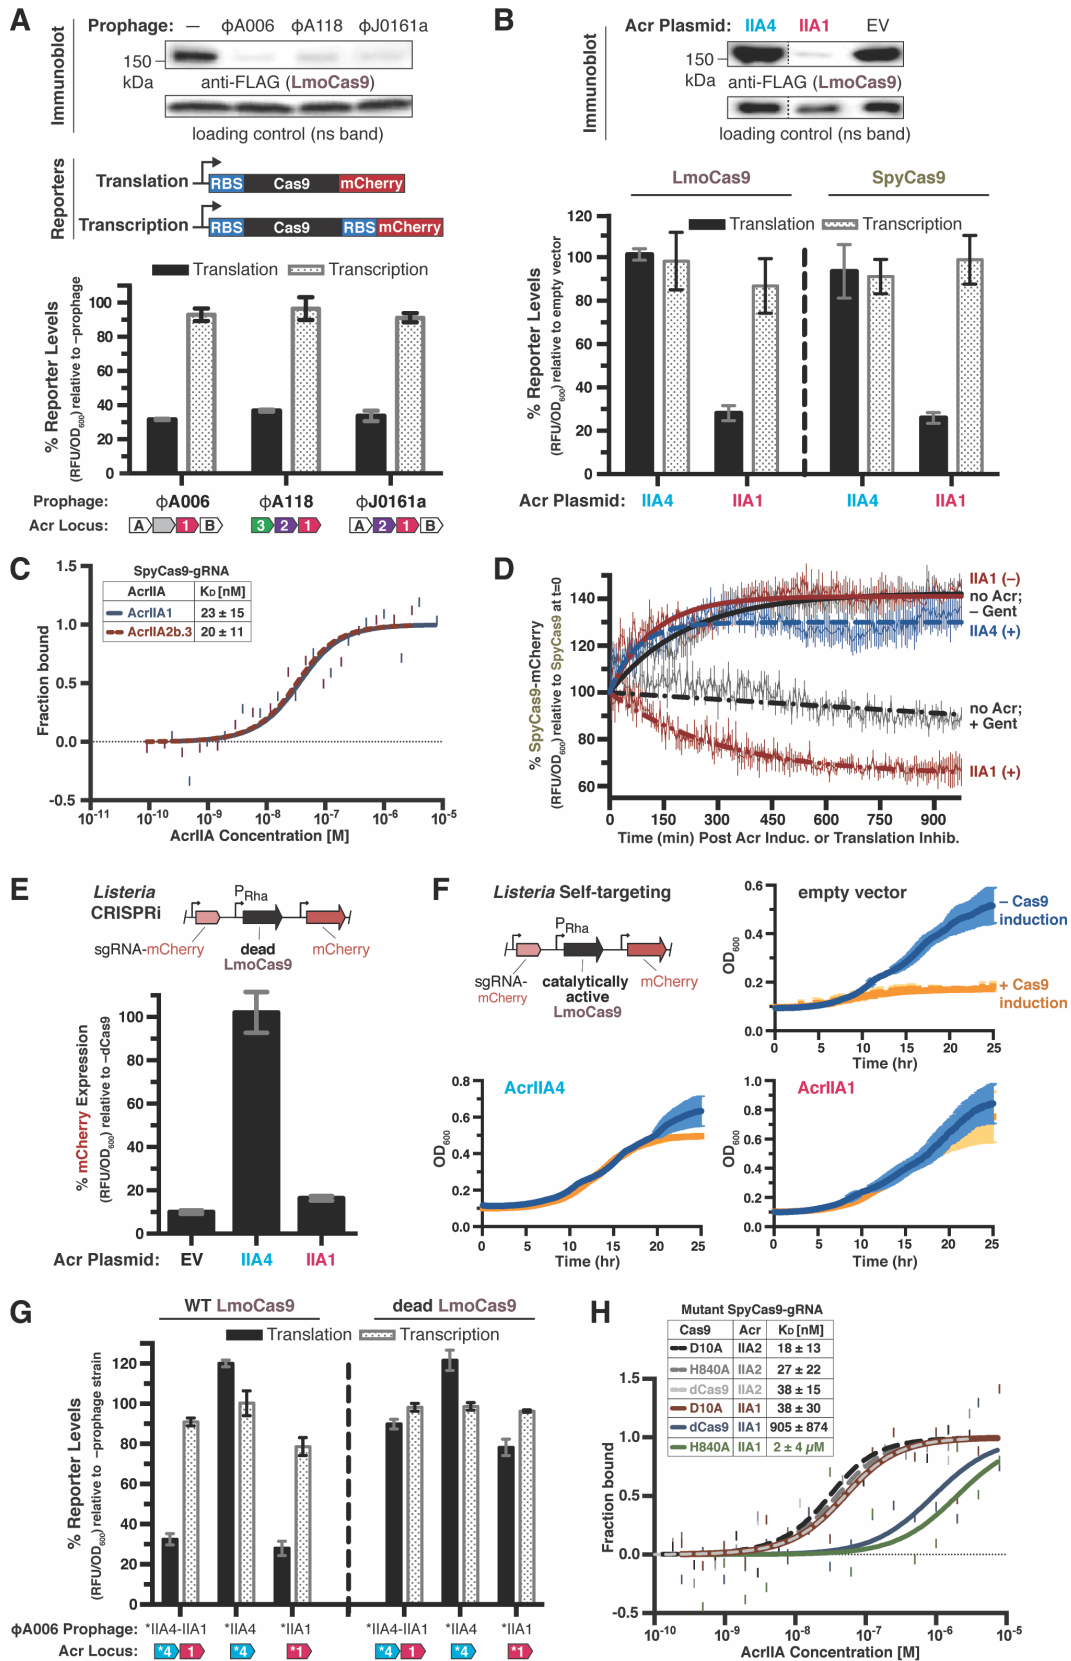

544 **Figure 1. AcrIIA1 Binds Catalytically Active Cas9 and Triggers its Degradation in *Listeria***

545 (A and B) Immunoblots detecting FLAG-tagged LmoCas9 protein and a non-specific (ns) protein  
546 loading control in *Listeria monocytogenes* strain 10403s (*Lmo10403s*) lysogenized with the  
547 indicated wild-type prophages (A, top) or *Lmo10403s* containing Acr-expressing plasmids (B,  
548 top). Dashed lines indicate where intervening lanes were removed for clarity (B, top).  
549 Representative blots of at least three biological replicates are shown (A and B). Schematics of  
550 translational and transcriptional reporters used to measure Lmo or Spy Cas9 protein and mRNA  
551 levels in *Lmo10403s* (A, middle). Cas9 translational (black bars) and transcriptional (gray  
552 shaded bars) reporter measurements reflect the mean percentage mCherry relative  
553 fluorescence units (RFU normalized to OD<sub>600</sub>) in the indicated lysogens (A, bottom) or strains  
554 with Acr-expressing plasmids (B, bottom) relative to the control strain lacking a prophage (–  
555 prophage) (A, bottom) or containing an empty vector (B, bottom). Error bars represent the mean  
556 ± SD of at least three biological replicates.

557 (C) Quantification of the binding affinities (K<sub>D</sub>; boxed inset) of AcrIIA1 and AcrIIA2b.3 for WT  
558 SpyCas9-gRNA using microscale thermophoresis. Data shown are representative of three  
559 independent experiments.

560 (D) SpyCas9-mCherry protein levels post anti-CRISPR induction or translation inhibition.  
561 *Lmo10403s* strains expressing SpyCas9-mCherry from the constitutively active pHyper  
562 promoter and AcrIIA1 or AcrIIA4 from an inducible promoter were grown to mid-logarithmic  
563 phase and treated with 100 mM rhamnose to induce Acr expression (+, thick dashed lines) or  
564 100 mM glycerol as a neutral carbon source control (–, thick solid lines) and 5 µg/mL gentamicin  
565 (Gent) to inhibit translation (+) or water (–) as a control. SpyCas9-mCherry protein  
566 measurements reflect the mean percentage fluorescence (RFUs normalized to OD<sub>600</sub>) relative to  
567 the SpyCas9-mCherry levels at the time (0 min) translation inhibition was initiated (thin solid  
568 lines). Error bars (vertical lines) represent the mean ± SD of at least three biological replicates.  
569 Data were fitted by nonlinear regression to generate best-fit decay curves (thick lines). See  
570 Figure S1D for additional controls and S1E for data showing tight repression of the pRhamnose  
571 promoter under non-inducing conditions.

572 (E and F) Anti-CRISPR inhibition of CRISPRi (E) or self-targeting (F) in *Listeria*. *Lmo10403s*  
573 strains contain chromosomally-integrated constructs expressing dead (E) or catalytically active  
574 (F) LmoCas9 from the inducible pRha-promoter and a sgRNA that targets the pHep-promoter  
575 driving mCherry expression. For CRISPRi, mCherry expression measurements reflect the mean  
576 percentage fluorescence (RFU normalized to OD<sub>600</sub>) in deadCas9-induced cells relative to  
577 uninduced (–dCas9) controls of three biological replicates ± SD (error bars) (E). For self-  
578 targeting, bacterial growth was monitored after LmoCas9 induction (orange lines) or no  
579 induction (blue lines) and data are displayed as the mean OD<sub>600</sub> of three biological replicates ±  
580 SD (error bars) (F). See Figure S1F for CRISPRi data with *Lmo10403s* expressing dead  
581 SpyCas9.

582 (G) Translational (black bars) and transcriptional (gray shaded bars) reporter levels of  
583 catalytically active (left) and dead LmoCas9 (right) in *Lmo10403s* lysogenized with engineered  
584 isogenic ΦA006 prophages encoding the indicated anti-CRISPRs. Measurements were  
585 normalized and graphed as in (A, bottom) with error bars representing the mean ± SD of at least  
586 three biological replicates. (\*) Indicates the native orfA RBS (strong) in ΦA006 was used for Acr  
587 expression. See Figure S1H for equivalent data with *Lmo10403s* expressing SpyCas9.

588 (H) Quantification of the binding affinities (K<sub>D</sub>; boxed inset) of AcrIIA1 (IIA1, solid lines) and  
589 AcrIIA2b.3 (IIA2, dashed lines) for catalytically dead (dCas9) and nickase (D10A or H840A)  
590 SpyCas9-gRNA complexes using microscale thermophoresis. Data shown are representative of  
591 three independent experiments.



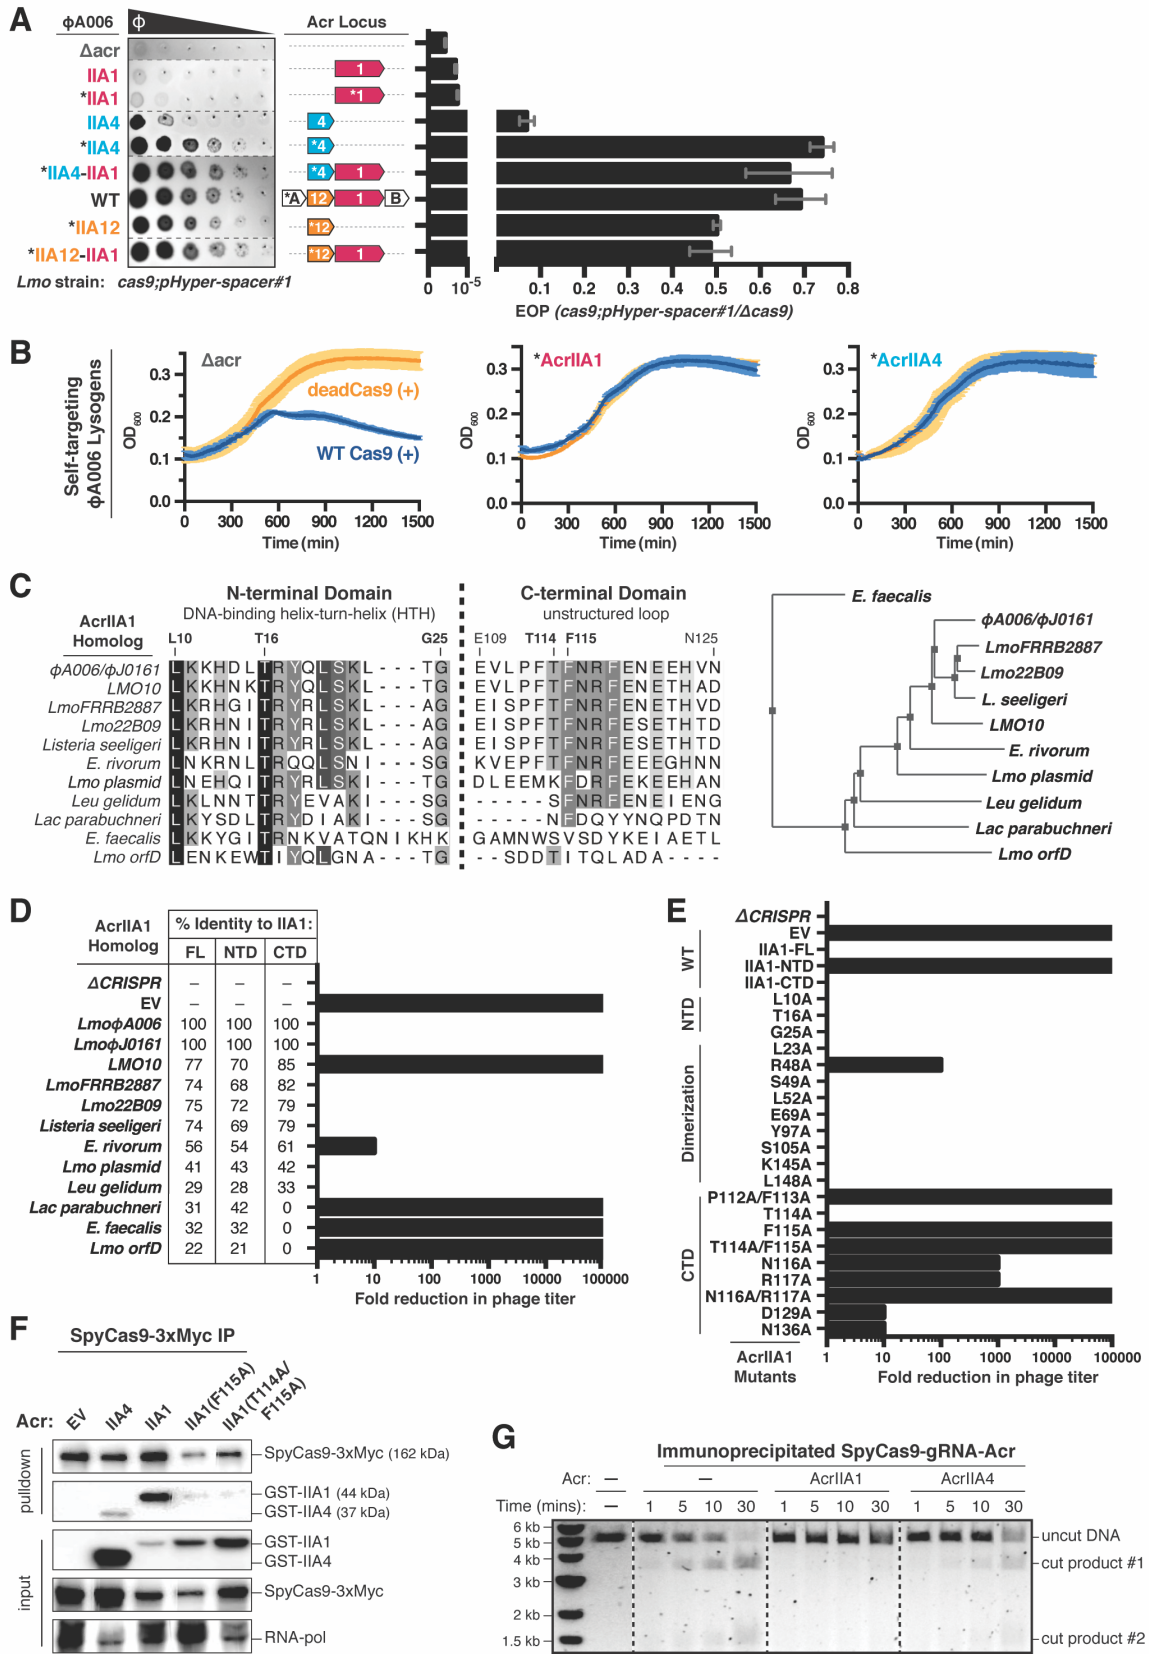

592 **Figure 2. AcrIIA1 Inhibits Cas9 DNA Cleavage to Protect Prophages During Lysogeny**

593 (A) Left: Representative image of plaquing assays where isogenic  $\Phi$ A006 phages are titrated in  
594 ten-fold serial dilutions (black spots) on a lawn of *Lmo10403s* (gray background). Dashed lines  
595 indicate where intervening rows were removed for clarity. Right: Efficiency of plaquing (EOP) of  
596 isogenic  $\Phi$ A006 phages (expressing the indicated anti-CRISPRs) on *Lmo10403s*. Plaque  
597 forming units (PFUs) were quantified on *Lmo10403s* overexpressing the first spacer in the  
598 native CRISPR array that targets  $\Phi$ A006 (*cas9;pHyper-spacer#1*) and normalized to the number  
599 of PFUs measured on a non-targeting *Lmo10403s*-derived strain ( $\Delta cas9$ ). Data are displayed as  
600 the mean EOP of at least three biological replicates  $\pm$  SD (error bars). See Figure S2A for EOP  
601 measurements of additional  $\Phi$ A006 phages.

602 (B) Bacterial growth curves of self-targeting *Lmo10403s::* $\Phi$ A006 isogenic lysogens expressing  
603 the indicated anti-CRISPRs and rhamnose-induced (+) WT or dead LmoCas9. WT LmoCas9  
604 induction (blue lines), but not dead LmoCas9 (orange lines) is lethal in an Acr-deficient ( $\Delta acr$ )  
605 strain because the *Lmo10403s* CRISPR array contains a spacer targeting the  $\Phi$ A006 prophage  
606 integrated in the bacterial genome. Data are displayed as the mean OD<sub>600</sub> of at least three  
607 biological replicates  $\pm$  SD (error bars) as a function of time (min). (\*) Indicates the native orfA  
608 RBS (strong) in  $\Phi$ A006 was used for Acr expression.

609 (C) Left: Alignment of AcrIIA1 homolog protein sequences denoting key residues. Right:  
610 Phylogenetic tree of the protein sequences of AcrIIA1 homologs. See Figure S4D for a complete  
611 alignment of the AcrIIA1 homolog protein sequences.

612 (D and E) Fold reduction in phage titer in response to SpyCas9 targeting of a *P.*  
613 *aeruginosa* DMS3m-like phage in the presence of AcrIIA1 homologs (D) or mutants (E). The  
614 percent protein sequence identities of each homolog to the full-length (FL) or domains (NTD or  
615 CTD) of AcrIIA1 <sub>$\Phi$ A006</sub> (IIA1) are listed in (D). The displayed fold reductions in phage titer were  
616 qualitatively determined by examining three biological replicates of each phage-plaquing  
617 experiment. See Figure S3A for representative pictures of the corresponding phage-plaquing  
618 experiments.

619 (F) Immunoblots detecting GST-tagged anti-CRISPR proteins that co-immunoprecipitated with  
620 Myc-tagged SpyCas9 in a *P. aeruginosa* strain heterologously expressing Type II-A SpyCas9-  
621 gRNA and the indicated Acrs. For input samples, one-hundredth lysate volume was analyzed to  
622 verify tagged protein expression and RNA-polymerase was used as a loading control.  
623 Representative blots of at least three biological replicates are shown. See Figure S2F for the  
624 reciprocal GST-Acr pulldown.

625 (G) Time courses of SpyCas9 DNA cleavage reactions in the presence of the indicated anti-  
626 CRISPRs conducted with SpyCas9-gRNA-Acr (or no Acr, -) complexes immunoprecipitated  
627 from *P. aeruginosa*. Dashed lines indicate where intervening lanes were removed for clarity.  
628 Data shown are representative of three independent experiments. See Figure S2H for reactions  
629 with AcrIIA1 mutants.

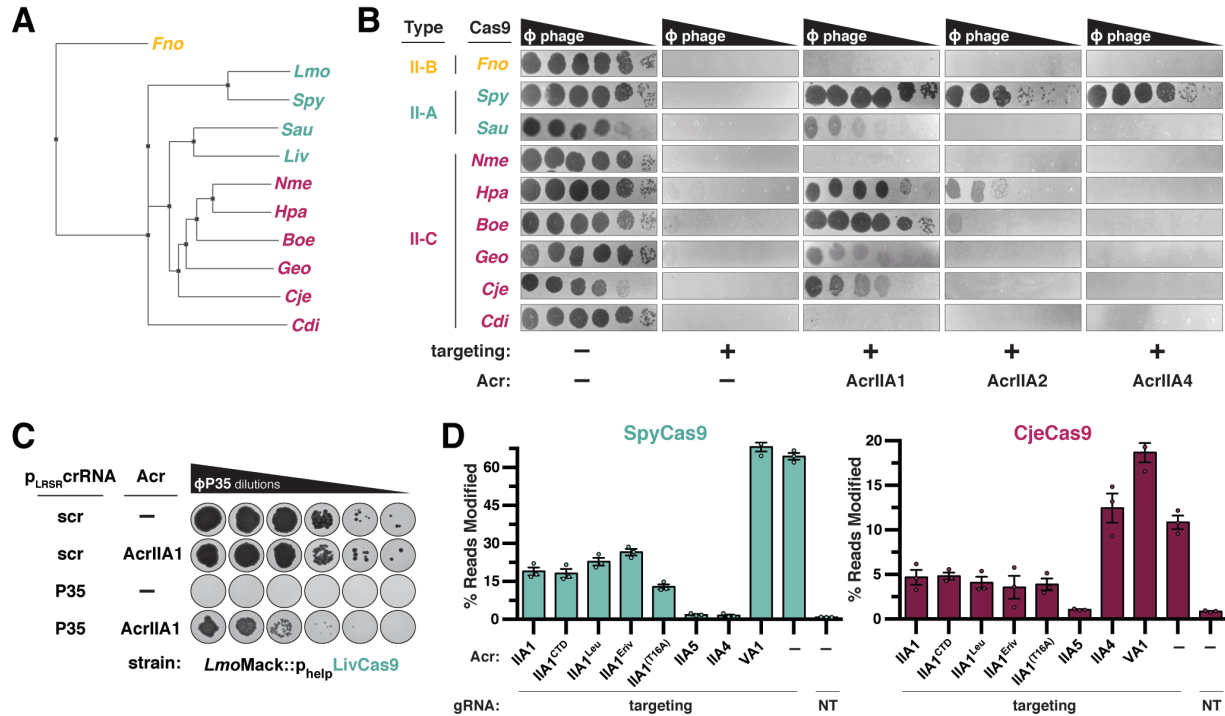

630 **Figure 3. AcrIIA1 is a Broad-Spectrum Cas9 Inhibitor**

631 (A) Phylogenetic tree of the protein sequences of Cas9 orthologues: *Francisella novicida* (*Fno*),  
 632 *Listeria monocytogenes* (*Lmo*), *Streptococcus pyogenes* (*Spy*), *Staphylococcus aureus* (*Sau*),  
 633 *Listeria ivanovii* (*Liv*), *Neisseria meningitidis* (*Nme*), *Haemophilus parainfluenzae* (*Hpa*),  
 634 *Brackiella oedipodis* (*Boe*), *Geobacillus stearothermophilus* (*Geo*), *Campylobacter jejuni* (*Cje*),  
 635 *Corynebacterium diphtheriae* (*Cdi*).

636 (B) Plaqueing assays where the *E. coli* phage Mu is titrated in ten-fold serial dilutions (black  
 637 spots) on lawns of *E. coli* (gray background) expressing the indicated anti-CRISPR proteins and  
 638 Type II-A, II-B and II-C Cas9-sgRNA combinations programmed to target phage DNA.  
 639 Representative pictures of at least 3 biological replicates are shown.

640 (C) Plaqueing assays where the *Listeria* phage ΦP35 is titrated in ten-fold serial dilutions (black  
 641 spots) on lawns of *L. monocytogenes* Mack (gray background) expressing episomal AcrIIA1 or  
 642 no Acr (–), chromosomally-integrated LivCas9/tracrRNA, and episomal (pLRSR) crRNA that  
 643 targets ΦP35 phage DNA or a non-targeting control (scr).

644 (D) Gene editing activities of Cas9 orthologues in human cells in the presence of AcrIIA1  
 645 variants and orthologues. AcrIIA4 is a known inhibitor of *SpyCas9*, AcrIIA5 is a broad-spectrum  
 646 inhibitor (Garcia et al., 2019, *in revision*), and AcrVA1 as a known non-inhibiting control for  
 647 *SpyCas9* orthologues. NT, no-sgRNA control condition. Error bars indicate SEM for three  
 648 independent biological replicates. See Figure S3F for editing experiments with additional Cas9  
 649 orthologues.

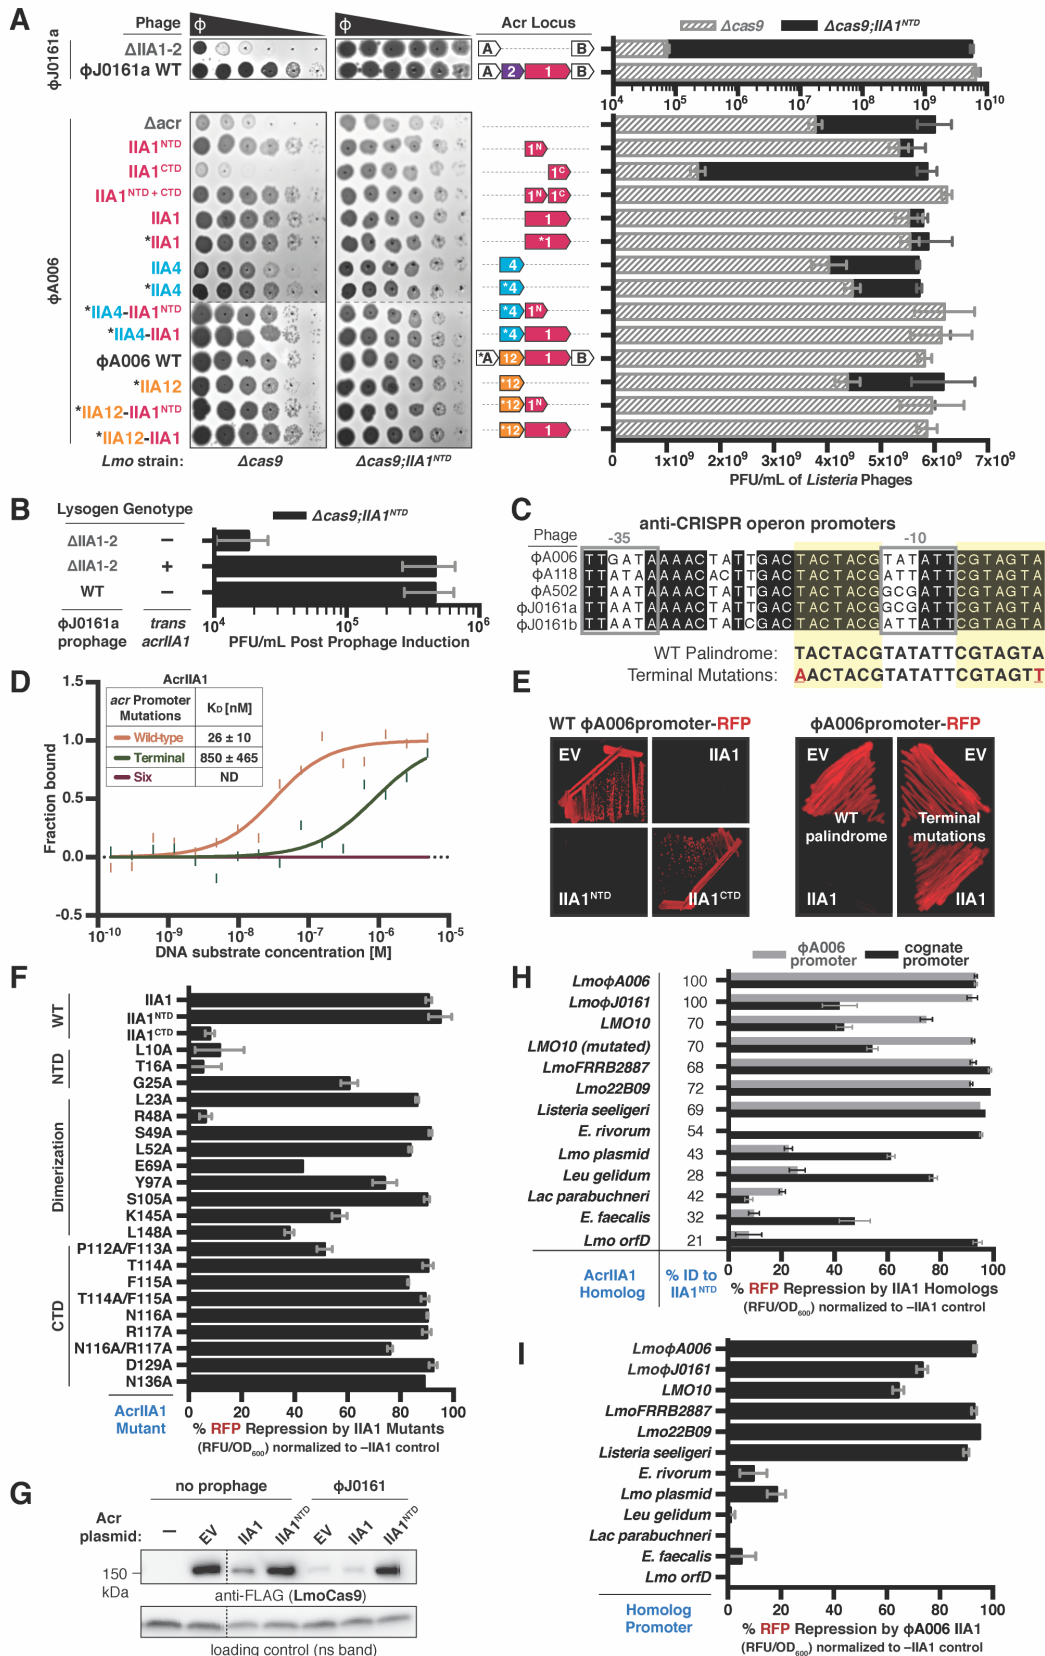

650 **Figure 4. The AcrIIA1 N-terminal Domain Autorepresses the Anti-CRISPR Promoter**

651 (A) Left: Representative images of plaquing assays where the indicated *Listeria* phages were  
652 titrated in ten-fold serial dilutions (black spots) on lawns of *Lmo10403s* (gray background)  
653 lacking Cas9 and encoding AcrIIA1<sup>NTD</sup> ( $\Delta cas9; IIA1^{NTD}$ ) or not ( $\Delta cas9$ ). Dashed lines indicate  
654 where intervening rows were removed for clarity. Right: Cas9-independent replication of  
655 isogenic  $\Phi J0161a$  or  $\Phi A006$  phages in *Listeria*. Plaque forming units (PFUs) were quantified on  
656 *Lmo10403s* lacking *cas9* ( $\Delta cas9$ ) and expressing AcrIIA1<sup>NTD</sup> (black bars) or not (gray shaded  
657 bars). Data are displayed as the mean PFU/mL of at least three biological replicates  $\pm$  SD (error  
658 bars).

659 (B) Induction efficiency of  $\Phi J0161$  prophages. Prophages were induced with mitomycin C from  
660 *Lmo10403s::\Phi J0161* lysogens expressing *cis-acrIIA1* from the prophage *Acr* locus (WT) or not  
661 ( $\Delta IIA1-2$ ) and *trans-acrIIA1* from the bacterial host genome (+) or not (-). Plaque forming units  
662 (PFUs) were quantified on *Lmo10403s* lacking *cas9* and expressing AcrIIA1<sup>NTD</sup> ( $\Delta cas9; IIA1^{NTD}$ ).  
663 Data are displayed as the mean PFU/mL after prophage induction of four biological replicates  $\pm$   
664 SD (error bars).

665 (C) Alignment of the phage anti-CRISPR promoter nucleotide sequences denoting the -35 and -  
666 10 elements (gray boxes) and conserved palindromic sequence (yellow highlight). Terminal  
667 palindrome mutations (red letters) were introduced for the binding assay in (D). See Figure S4A  
668 for a complete alignment of the promoters.

669 (D) Quantification of the binding affinity ( $K_D$ ; boxed inset) of AcrIIA1 for the palindromic  
670 sequence within the *acr* promoter using microscale thermophoresis. ND indicates no binding  
671 detected. Data shown are representative of three independent experiments.

672 (E) Expression of RFP transcriptional reporters containing the wild-type (left) or mutated (right)  
673  $\Phi A006$ -*Acr*-promoter in the presence of AcrIIA1 (IIA1) or each domain (IIA1<sup>NTD</sup> or IIA1<sup>CTD</sup>).  
674 Representative images of three biological replicates are shown.

675 (F and H-I) Repression of RFP transcriptional reporters containing the  $\Phi A006$ -*Acr*-promoter  
676 (black bars in F; gray bars in H) or the cognate-AcrIIA1-homolog-promoters (black bars in H and  
677 I) by AcrIIA1 <sub>$\Phi A006$</sub>  (mutants in F; wild-type in I) or AcrIIA1 homolog (H) proteins. Data are shown  
678 as the mean percentage RFP repression in the presence of the indicated AcrIIA1 variants  
679 relative to controls lacking AcrIIA1 of at least three biological replicates  $\pm$  SD (error bars). The  
680 percent protein sequence identities of each homolog to the  $\Phi A006$  AcrIIA1<sup>NTD</sup> are listed in (H).

681 (G) Immunoblots detecting FLAG-tagged LmoCas9 protein and a non-specific (ns) protein  
682 loading control in *Lmo10403s::\Phi J0161a* lysogens or non-lysogenic strains containing plasmids  
683 expressing AcrIIA1 (IIA1) or AcrIIA1<sup>NTD</sup> (IIA1<sup>NTD</sup>). Dashed lines indicate where intervening lanes  
684 were removed for clarity. Representative blots of at least three biological replicates are shown.



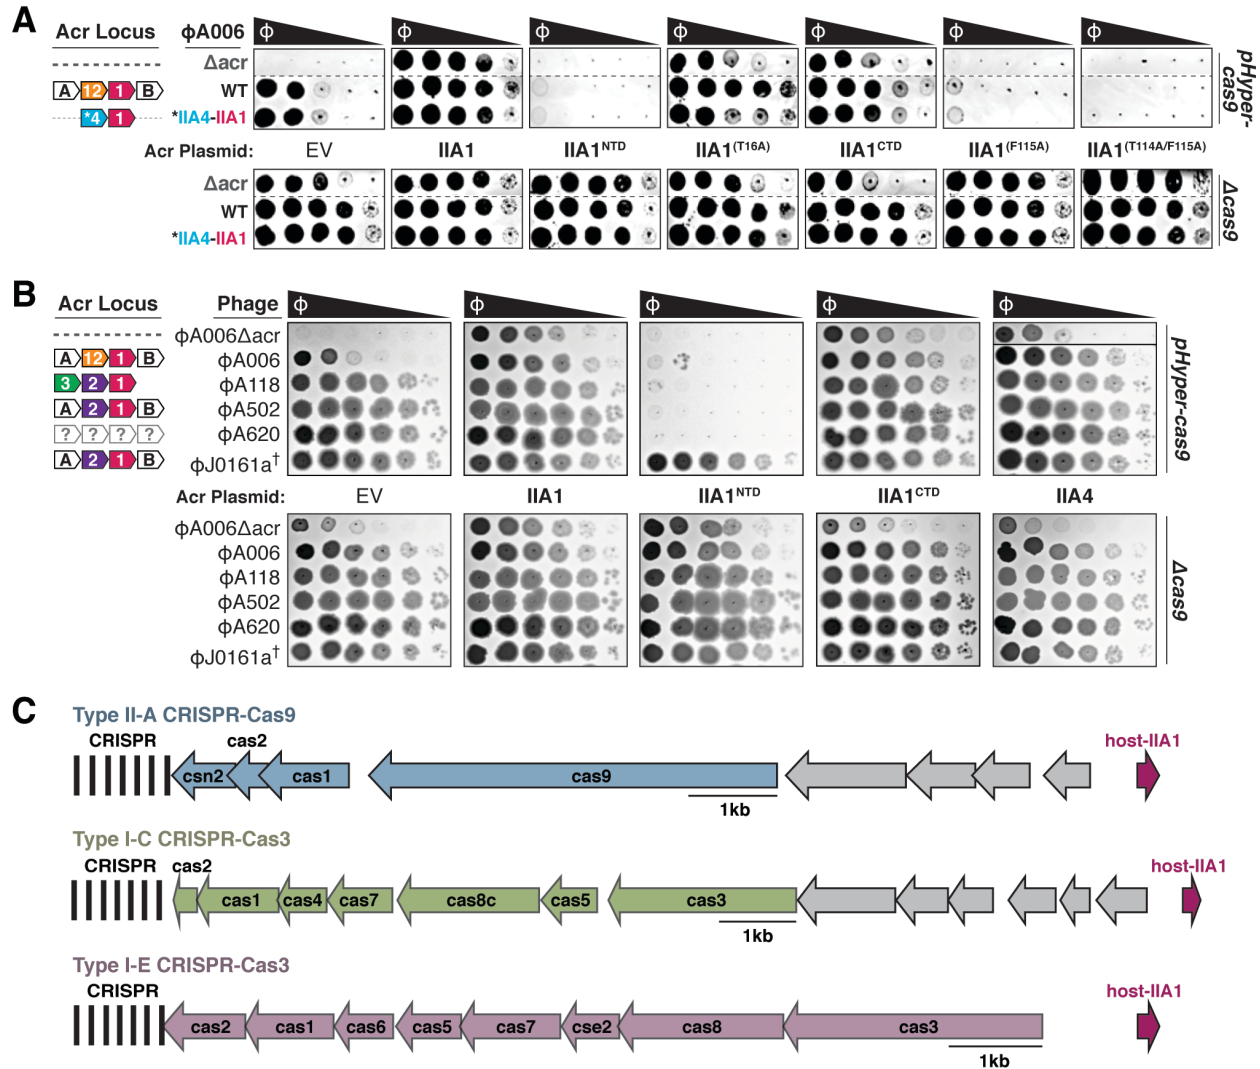

685 **Figure 5. AcrIIA1<sup>NTD</sup> Encoded from a Bacterial Host Displays “anti-anti-CRISPR” Activity**  
 686 (A-B) Plaquing assays where engineered (A) or wild-type (B) *L. monocytogenes* phages are  
 687 titrated in ten-fold dilutions (black spots) on lawns of *L. monocytogenes* (gray background)  
 688 expressing anti-CRISPRs from plasmids, LmoCas9 from a strong promoter (*pHyper-cas9*) or  
 689 lacking Cas9 ( $\Delta cas9$ ) and the natural CRISPR array containing spacers with complete or partial  
 690 matches to the DNA of each phage. (†) Denotes the absence of a spacer targeting the  $\Phi$ J0161a  
 691 phage. Representative pictures of at least 3 biological replicates are shown. Dashed lines  
 692 indicate where intervening rows were removed for clarity (A). Solid lines indicate where  
 693 separate images are shown.  
 694 (C) Schematic of bacterial (host) AcrIIA1<sup>NTD</sup> homologs encoded next to Type II-A, I-C, and I-E  
 695 CRISPR-Cas loci in *Lactobacillus delbrueckii* strains.

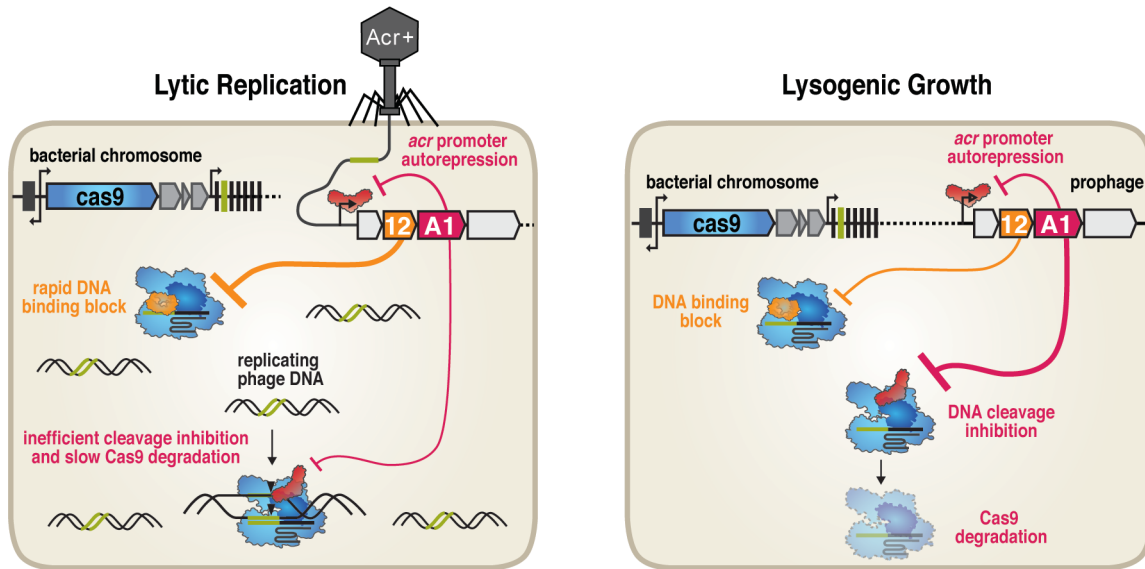

696 **Figure 6. Model for *Listeria* Phage Anti-CRISPR Functions in Lysogenic and Lytic Growth**  
697 *Listeria* temperate phages encode the multifunctional AcrIIA1 (red) for protection against  
698 CRISPR-Cas in lysogeny (AcrIIA1<sup>CTD</sup>) and autorepression of anti-CRISPR transcription  
699 (AcrIIA1<sup>NTD</sup>). In lysogeny (right), AcrIIA1 binds the Cas9 HNH domain (dark blue in Cas9) to  
700 prevent DNA cleavage and triggers Cas9 degradation. For replication in lytic growth (left),  
701 AcrIIA1 is slow or inefficient, thus a distinct coexisting anti-Cas9 protein (like AcrIIA12, orange)  
702 is necessary to rapidly inactivate Cas9.

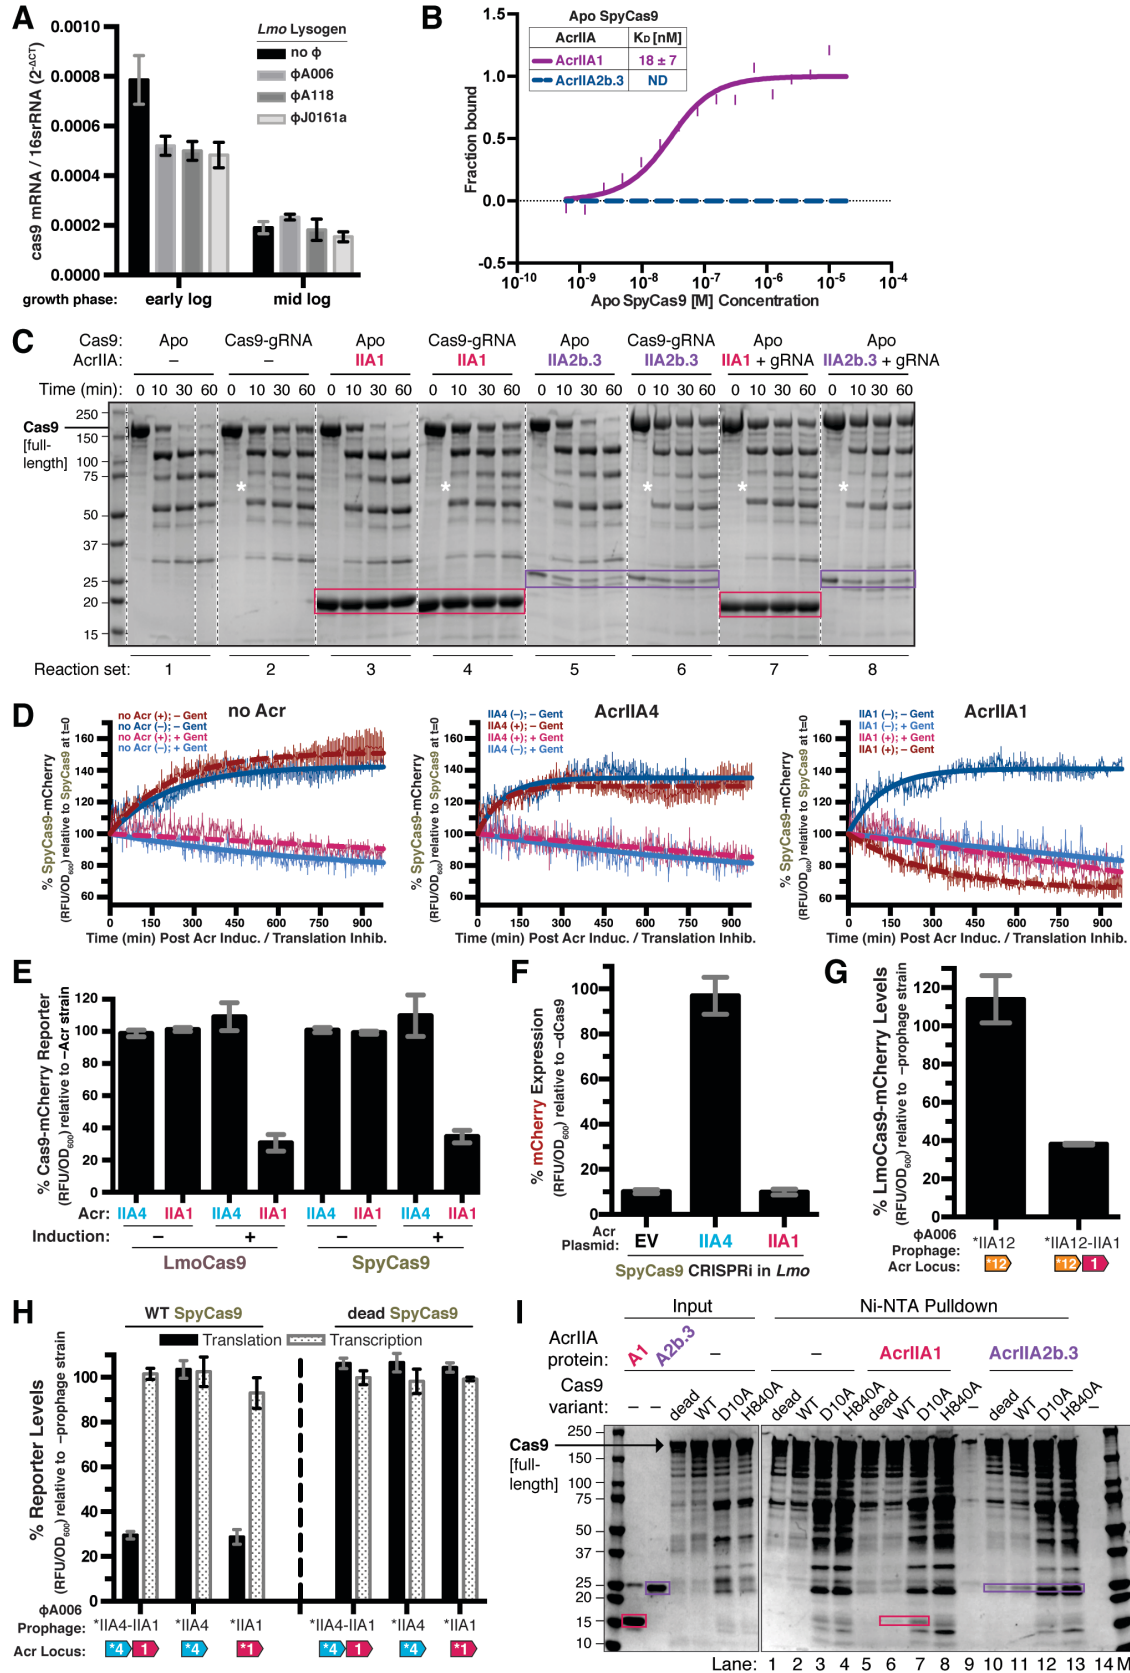

703 **Figure S1. AcrIIA1 Binds Cas9 and Stimulates Post-transcriptional Degradation of Lmo**



704 **and Spy Cas9 in *Listeria*, Related to Figure 1**

705 (A) Cas9 mRNA levels of *Lmo10403s* lysogens containing the indicated prophages during early  
706 or mid-logarithmic growth as quantified by qRT-PCR. Transcript measurements were conducted  
707 in technical triplicate and data are shown as the mean  $2^{-\Delta CT}$  values normalized to the 16S rRNA  
708 endogenous control gene  $\pm$  SD (error bars).

709 (B) Quantification of the binding affinities ( $K_D$ ; boxed inset) of AcrIIA1 and AcrIIA2b.3 for Apo  
710 SpyCas9 using microscale thermophoresis. ND indicates no binding was detected. Data shown  
711 are representative of three independent experiments.

712 (C) Limited  $\alpha$ -chymotrypsin proteolysis of SpyCas9-Acr complexes. Proteolysis of Apo SpyCas9  
713 (set 1) or SpyCas9-gRNA (set 2) without anti-CRISPR (–) or in the presence of AcrIIA1 (sets 3,  
714 4, 7; magenta boxes) or AcrIIA2b.3 (sets 5, 6, 8; purple boxes). For reaction sets 7 and 8, Apo  
715 Cas9 was first incubated with anti-CRISPR followed by addition of gRNA. (\*) Denotes a  
716 proteolysis product that appears in all Cas9-gRNA reactions but not Apo Cas9 reactions.  
717 Dashed lines indicate where intervening lanes were removed for clarity.

718 (D) SpyCas9-mCherry protein levels post anti-CRISPR induction or translation inhibition.  
719 *Lmo10403s* strains expressing SpyCas9-mCherry from the constitutively active pHyper  
720 promoter and AcrIIA1 or AcrIIA4 from an inducible promoter were grown to mid-logarithmic  
721 phase and treated with 100 mM rhamnose to induce Acr expression (+, thick dashed lines) or  
722 100 mM glycerol as a neutral carbon source control (–, thick solid lines) and 5  $\mu$ g/mL gentamicin  
723 (Gent) to inhibit translation (+) or water (–) as a control. SpyCas9-mCherry protein  
724 measurements reflect the mean percentage fluorescence (RFUs normalized to OD<sub>600</sub>) relative to  
725 the SpyCas9-mCherry levels at the time (0 min) translation inhibition was initiated (thin solid  
726 lines). Error bars (vertical lines) represent the mean  $\pm$  SD of at least three biological replicates.  
727 Data were fitted by nonlinear regression to generate best-fit decay curves (thick lines).

728 (E) Lmo or Spy Cas9-mCherry protein levels (black bars) in *Lmo10403s* expressing Lmo or Spy  
729 Cas9-mCherry from the constitutively active pHyper promoter and AcrIIA1 or AcrIIA4 from an  
730 inducible promoter. Cas9-mCherry measurements reflect the mean percentage mCherry (RFU  
731 normalized to OD<sub>600</sub>) in cells treated with 100 mM rhamnose (+, induced Acr expression) or 100  
732 mM glycerol (–, non-induced Acr expression), relative to a control strain lacking an anti-CRISPR  
733 (–Acr). Error bars represent the mean  $\pm$  SD of at least three biological replicates.

734 (F) Anti-CRISPR inhibition of CRISPRi in a *Listeria Lmo10403s* strain containing a  
735 chromosomally-integrated construct expressing dead SpyCas9 from the inducible pRha-  
736 promoter and a sgRNA that targets the pHelp-promoter driving mCherry expression. mCherry  
737 expression measurements reflect the mean percentage fluorescence (RFU normalized to OD<sub>600</sub>)  
738 in deadCas9-induced cells relative to uninduced (–dCas9) controls of three biological replicates  
739  $\pm$  SD (error bars).

740 (G) Catalytically active LmoCas9-mCherry protein levels in *Lmo10403s* lysogenized with  
741 isogenic  $\Phi$ A006 prophages encoding AcrIIA12 alone or in combination with AcrIIA1. LmoCas9-  
742 mCherry (black bars) measurements reflect the mean percentage mCherry (RFUs normalized to  
743 OD<sub>600</sub>) in the indicated lysogens relative to the control strain lacking a prophage (–prophage).  
744 Error bars represent the mean  $\pm$  SD of at least three biological replicates. (\*) Indicates the  
745 native orfA RBS (strong) in  $\Phi$ A006 was used for Acr expression.

746 (H) Translational (black bars) and transcriptional (gray shaded bars) reporter levels of  
747 catalytically active and dead SpyCas9 in *Lmo10403s* lysogenized with isogenic  $\Phi$ A006  
748 prophages encoding the indicated anti-CRISPRs. Measurements were normalized and graphed  
749 as in (G) with error bars representing the mean  $\pm$  SD of at least three biological replicates. (\*)  
750 Indicates the native orfA RBS (strong) in  $\Phi$ A006 was used for Acr expression.

751 (I) Differential interactions of SpyCas9 nickases with AcrIIA1. Partially purified 6xHis-tagged  
752 SpyCas9 (WT, dead, D10A, H840A) proteins (input) were incubated with 2-fold molar excess  
753 gRNA and subjected to Ni-NTA pull-down in the presence or absence (lanes 1-4; –) 6-fold molar  
754 excess AcrIIA1 (lanes 5-8) or AcrIIA2b.3 (lanes 10-13). AcrIIA1 (magenta boxes) co-purifies

755 with WT and D10A (lanes 6 and 7) but not dead and H840A Cas9-gRNA (lanes 5 and 8).  
756 AcrIIA2b.3 (purple boxes) co-purifies with all four Cas9-gRNA complexes (lanes 10-13). AcrIIA1  
757 and A2b.3 were incubated with Ni-NTA beads in the absence of Cas9-gRNA to test for non-  
758 specific binding to Ni-NTA beads (lanes 9 and 14).

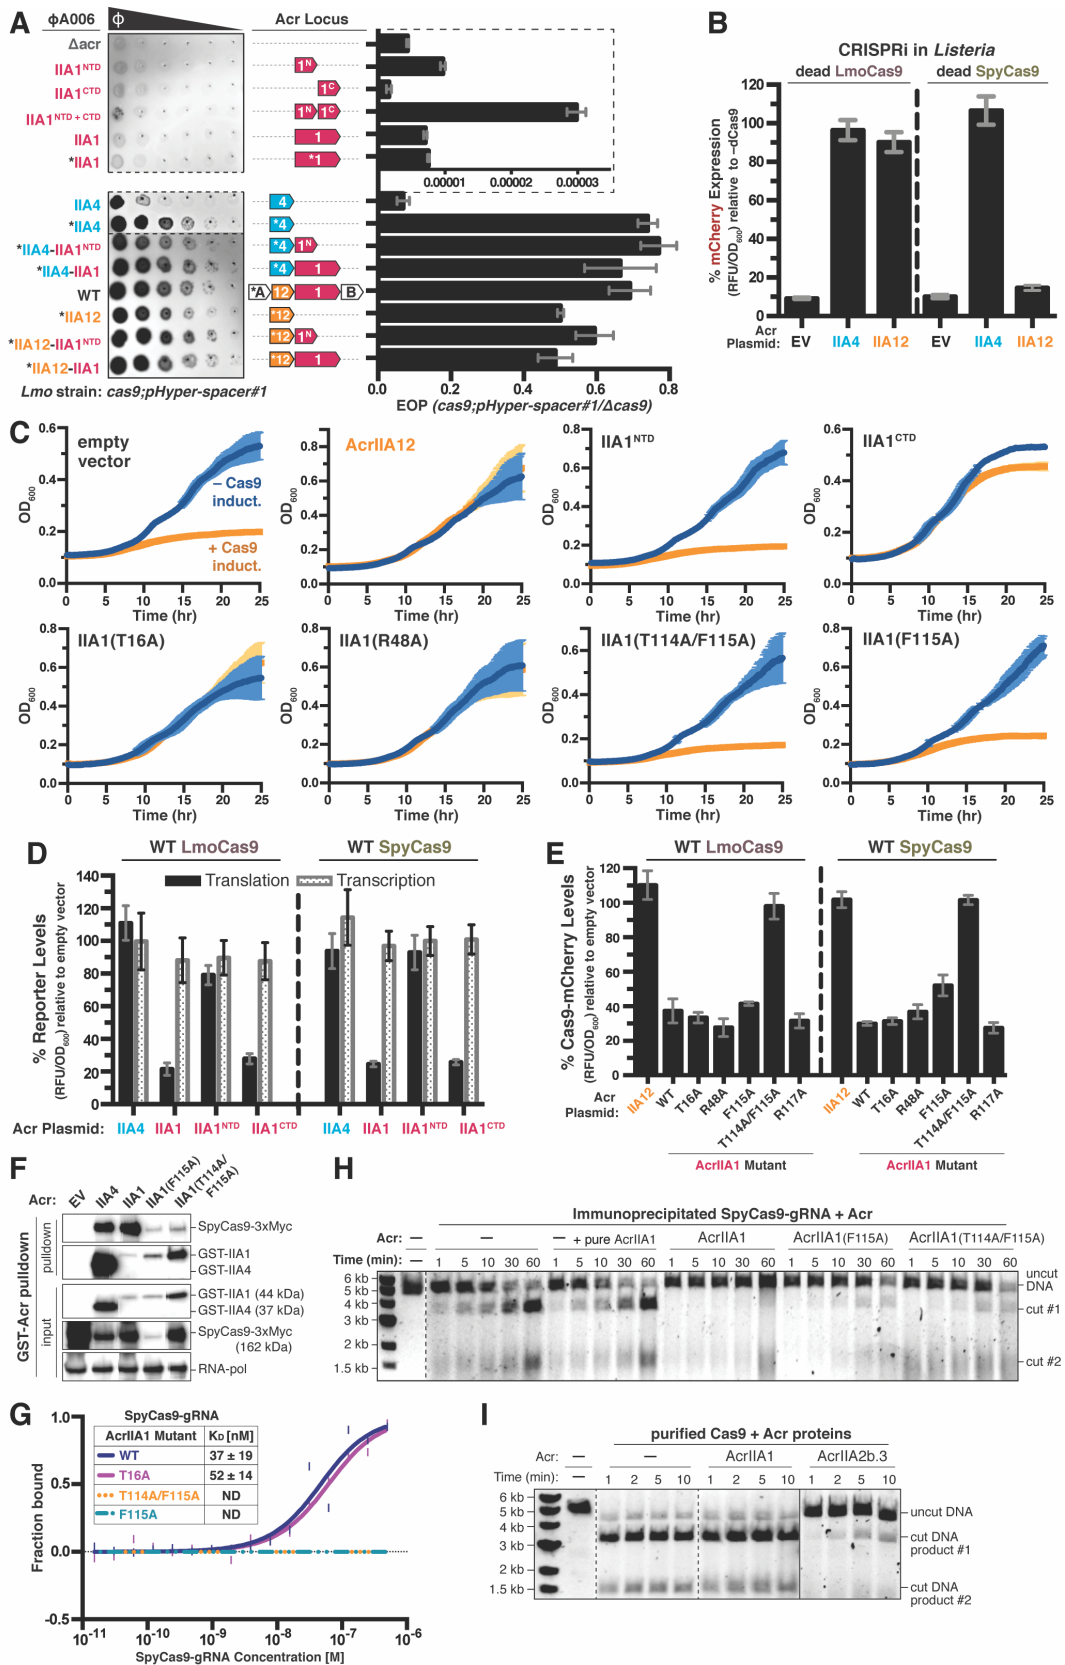

759 **Figure S2. AcrIIA1<sup>CTD</sup> Mutants Cannot Strongly Bind Cas9 or Trigger its Degradation,**

760 **Related to Figure 2**

761 (A) Left: Representative image of plaquing assays where isogenic  $\Phi$ A006 phages are titrated in  
762 ten-fold serial dilutions (black spots) on a lawn of *Lmo10403s* (gray background). Dashed lines  
763 indicate where intervening rows were removed for clarity. Right: Efficiency of plaquing (EOP) of  
764 isogenic  $\Phi$ A006 phages (expressing the indicated anti-CRISPRs) on *Lmo10403s*. Plaque  
765 forming units (PFUs) were quantified on *Lmo10403s* overexpressing the first spacer in the  
766 native CRISPR array that targets  $\Phi$ A006 (*cas9;pHyper-spacer#1*) and normalized to the number  
767 of PFUs measured on a non-targeting *Lmo10403s*-derived strain ( $\Delta cas9$ ). The dashed lines  
768 boxing the first 6 phages show a zoomed in view of the graph with a distinct x-axis scale. Data  
769 are displayed as the mean EOP of at least three biological replicates  $\pm$  SD (error bars). Note  
770 that this figure contains the same subset of data displayed in Figure 2A.

771 (B) AcrIIA12 anti-CRISPR activity in a *Lmo10403s* CRISPRi strain expressing Lmo or Spy  
772 deadCas9 from the inducible pRha-promoter and a sgRNA that targets the pHep-promoter  
773 driving mCherry expression. mCherry expression measurements reflect the mean percentage  
774 RFU in deadCas9-induced cells relative to uninduced ( $-dCas9$ ) controls of three biological  
775 replicates  $\pm$  SD (error bars). Note that AcrIIA12 inhibits Lmo but not Spy deadCas9-based  
776 CRISPRi, indicating its specificity against LmoCas9.

777 (C) Anti-CRISPR activity in *Lmo10403s* self-targeting strains containing chromosomally-  
778 integrated constructs expressing LmoCas9 from the inducible pRha-promoter and a sgRNA that  
779 targets the pHep promoter driving mCherry expression. Bacterial growth was monitored after  
780 LmoCas9 induction (orange lines) or no induction (blue lines) and data are displayed as the  
781 mean OD<sub>600</sub> of at least three biological replicates  $\pm$  SD (error bars).

782 (D) Translational (black bars) and transcriptional (gray shaded bars) reporter levels of  
783 catalytically active Lmo and Spy Cas9 in *Lmo10403s* containing plasmids expressing anti-  
784 CRISPRs. Reporter measurements reflect the mean percentage mCherry (RFU normalized to  
785 OD<sub>600</sub>) in the presence of the indicated anti-CRISPRs relative to the control strain containing an  
786 empty vector of three biological replicates  $\pm$  SD (error bars).

787 (E) Catalytically active Lmo and Spy Cas9-mCherry protein levels in *Lmo10403s* containing  
788 plasmids expressing anti-CRISPRs. Cas9-mCherry measurements (black bars) reflect the mean  
789 percentage mCherry (RFU normalized to OD<sub>600</sub>) in the presence of the indicated anti-CRISPRs  
790 relative to the control strain containing an empty vector of three biological replicates  $\pm$  SD (error  
791 bars).

792 (F) Immunoblots detecting 3xMyc-tagged SpyCas9 protein that co-immunoprecipitated with  
793 GST-tagged anti-CRISPR proteins in a *P. aeruginosa* strain heterologously expressing the Type  
794 II-A SpyCas9-gRNA system and the indicated Acrs. For input samples, one-hundredth lysate  
795 volume was analyzed to verify tagged protein expression and RNA-polymerase was used as a  
796 loading control. Representative blots of at least three biological replicates are shown.

797 (G) Quantification of the binding affinities ( $K_D$ ; boxed inset) of WT and mutant AcrIIA1 proteins  
798 with SpyCas9-gRNA using microscale thermophoresis. ND indicates no binding detected. Data  
799 shown are representative of three independent experiments.

800 (H-I) Time courses of SpyCas9 DNA cleavage reactions in the presence of the indicated anti-  
801 CRISPR proteins conducted with SpyCas9-gRNA-Acr complexes immunoprecipitated from *P.*  
802 *aeruginosa* (H) or recombinant proteins purified from *E. coli* (I). Where indicated, the reaction  
803 with SpyCas9-gRNA immunoprecipitated without an Acr (-) was supplemented with  
804 recombinant WT AcrIIA1 protein purified from *E. coli* (+ pure AcrIIA1) (H). Dashed lines indicate  
805 where intervening lanes were removed for clarity. Solid lines indicate a separate image. Data  
806 shown are representative of three independent experiments.

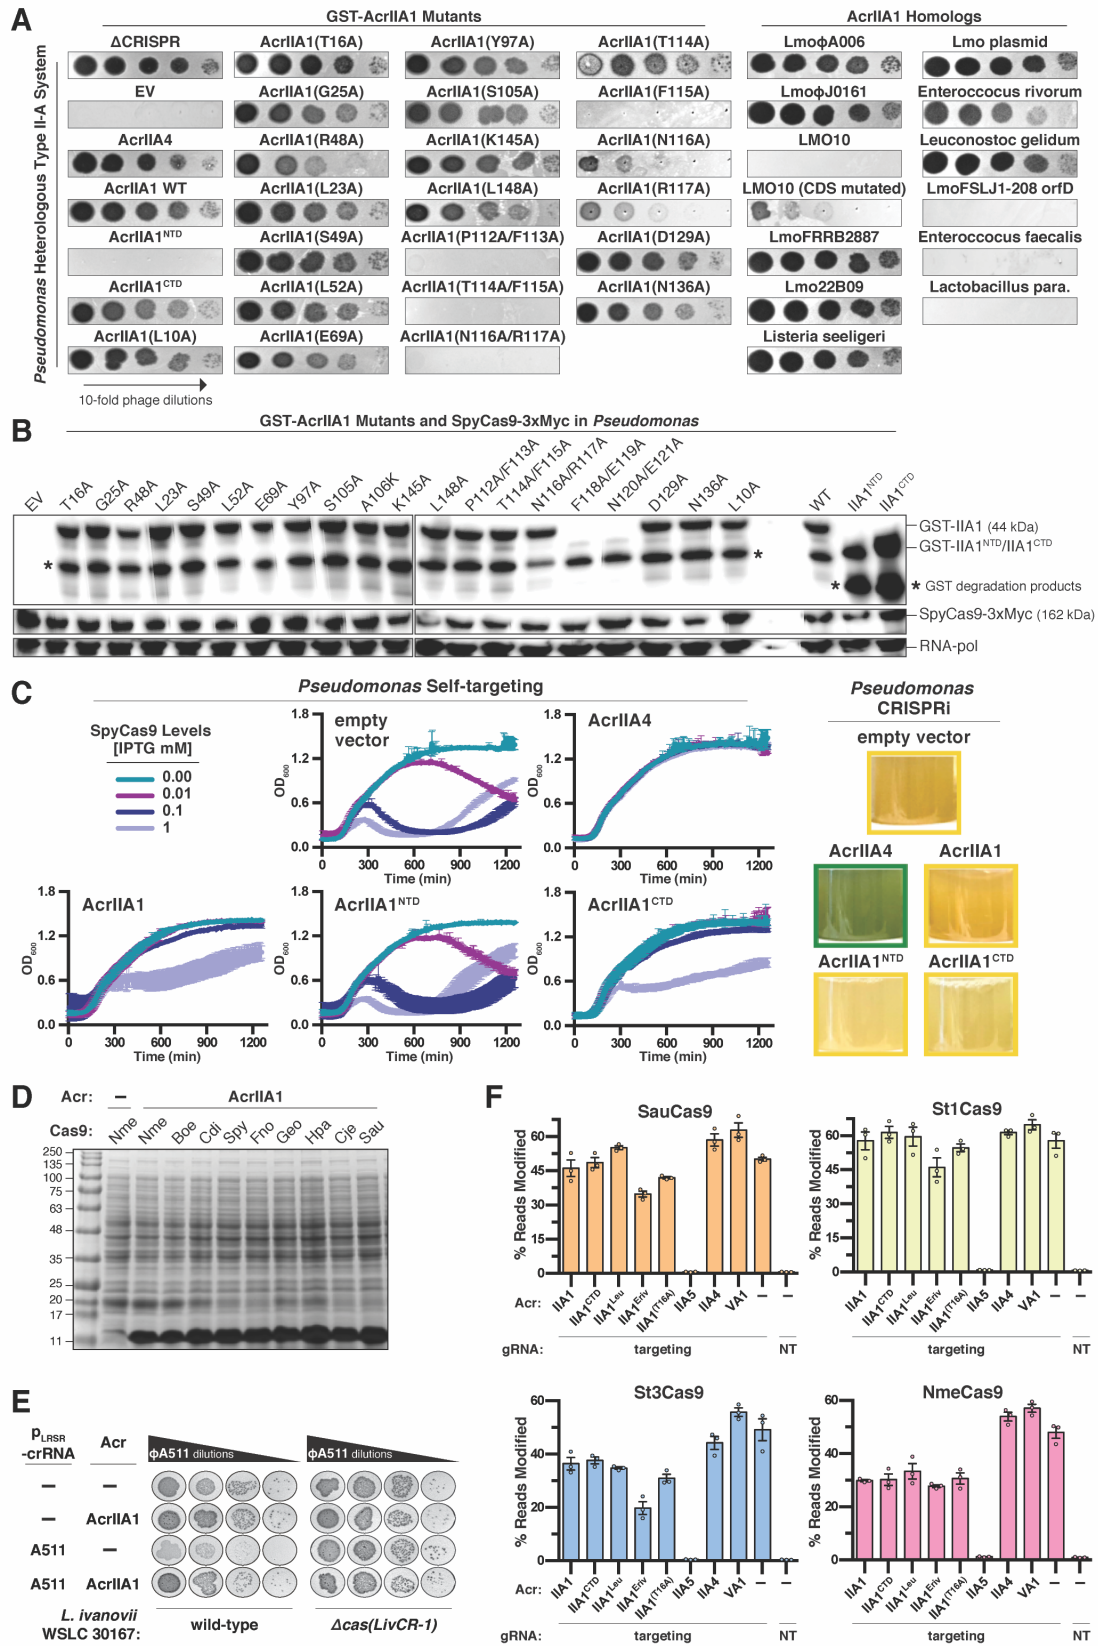

807 Figure S3. AcrIIA1 Inhibition of Cas9 Orthologues in Heterologous Hosts, Related to



808 **Figures 2 and 3**

809 (A) Plaquing assays where the *P. aeruginosa* DMS3m-like phage is titrated in ten-fold dilutions  
810 (black spots) on a lawn of *P. aeruginosa* (gray background) expressing the indicated anti-  
811 CRISPR proteins and Type II-A SpyCas9-sgRNA programmed to target phage DNA.  
812 Representative pictures of at least 3 biological replicates are shown.

813 (B) Immunoblots detecting GST-tagged AcrIIA1 (mutants or individual domains) proteins, Myc-  
814 tagged SpyCas9 protein, and RNA-polymerase as a protein loading control in a *P. aeruginosa*  
815 strain heterologously expressing the Type II-A SpyCas9-sgRNA system and the indicated Acrs.  
816 (\*) Denotes GST degradation products derived from GST-tagged Acr proteins. AcrIIA1 mutants  
817 that failed to express were not analyzed further.

818 (C) Anti-CRISPR activity in *P. aeruginosa* self-targeting (left) and CRISPRi (right) strains  
819 containing plasmids expressing anti-CRISPRs and chromosomally-integrated SpyCas9-sgRNA  
820 programmed to target the *phzM* gene promoter. For self targeting, SpyCas9 expression from  
821 the inducible pLAC-promoter was titrated using the indicated IPTG concentrations (mM) and  
822 bacterial growth curves display the mean OD<sub>600</sub> of at least three biological replicates ± SD (error  
823 bars) measured over time (left). CRISPRi was qualitatively assessed by inspecting the culture  
824 pigment. Transcriptional repression of the *phzM* gene by dCas9 generates a yellow culture  
825 whereas inhibition of dCas9 (e.g. by an Acr) allows *phzM* expression and pyocyanin production  
826 that generates a green culture. Representative pictures of at least three biological replicates are  
827 shown (right).

828 (D) SDS-PAGE and Coomassie Blue staining analysis of AcrIIA1 expression after IPTG  
829 induction in *E. coli* strains containing the indicated Cas9 orthologues.

830 (E) Plaquing assays where the *Listeria* phage ΦA511 is titrated in ten-fold serial dilutions (black  
831 spots) on lawns of the *Listeria ivanovii* WSLC 30167 (gray background) strain with an  
832 endogenous Type II-A LivCas9 system or lacking this system ( $\Delta cas$ ), plasmid-expressed  
833 AcrIIA1 or no Acr (-), and crRNA that targets ΦA511 phage DNA or a non-targeting control (-)  
834 expressed from the pLRSR plasmid.

835 (F) Gene editing activities of Cas9 orthologues in human cells in the presence of AcrIIA1  
836 variants and orthologues. AcrIIA4 is a known selective inhibitor of SpyCas9, AcrIIA5 is a broad-  
837 spectrum inhibitor (Garcia et al., 2019, *in revision*), and AcrVA1 as a known non-inhibiting  
838 control for SpyCas9 orthologues. NT, no-sgRNA control condition. Error bars indicate SEM  
839 for three independent biological replicates.

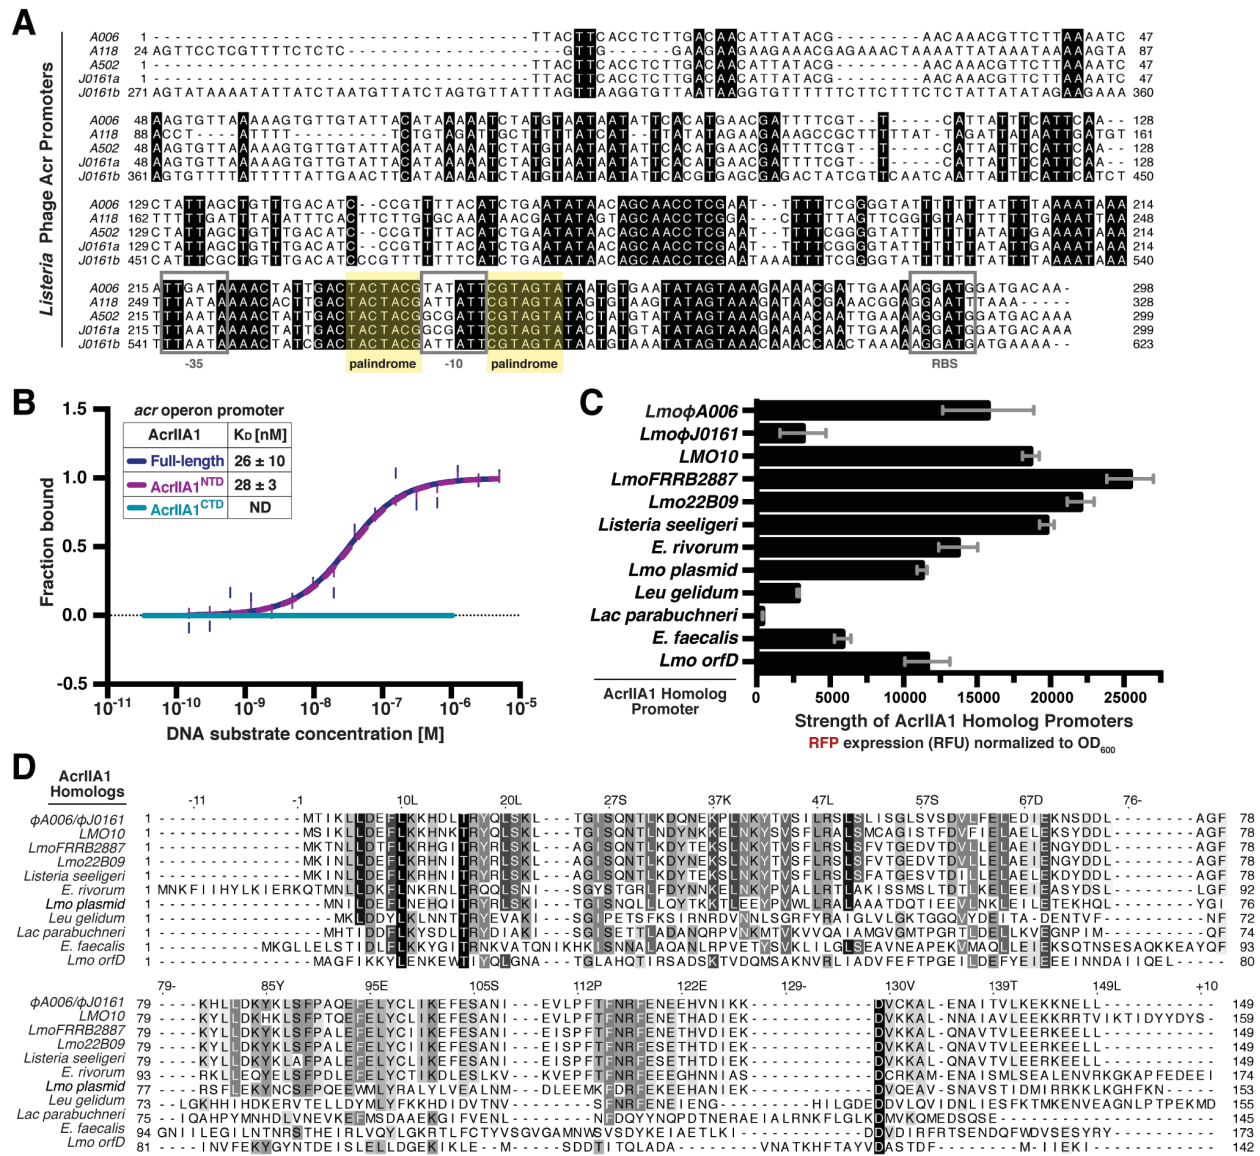

840 **Figure S4. Acr Promoters in Mobile Genetic Elements Across the *Firmicutes* Phylum are**  
 841 **Autoregulated by AcrIIA1 Homologs, Related to Figures 2 and 4**

842 (A) Alignment of the phage anti-CRISPR promoter nucleotide sequences denoting the -35 and -  
 843 10 elements and ribosomal binding site (RBS) (gray boxes) and conserved palindromic  
 844 sequence (yellow highlight).

845 (B) Quantification of DNA binding abilities (K<sub>D</sub>; boxed inset) of full-length AcrIIA1 and each  
 846 domain (AcrIIA1<sup>NTD</sup> and AcrIIA1<sup>CTD</sup>) using microscale thermophoresis. Data shown are  
 847 representative of three independent experiments. ND indicates no binding detected.

848 (C) Expression strength of the AcrIIA1 homolog promoters. Data are shown as the mean RFP  
 849 expression (RFU normalized to OD<sub>600</sub>) driven by each AcrIIA1 homolog promoter of at least  
 850 three biological replicates ± SD (error bars).

851 (D) Alignment of AcrIIA1 homolog protein sequences.

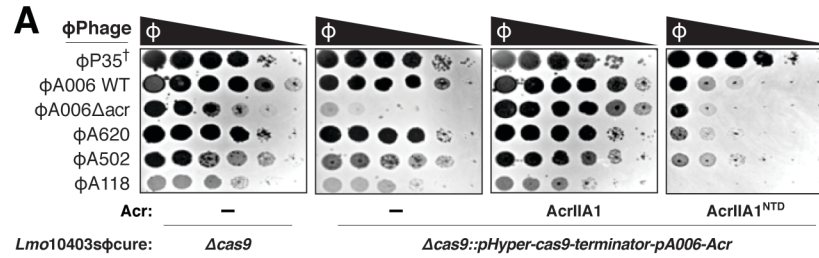

852 **Figure S5. Bacterial expression of *AcrIIA1<sup>NTD</sup>* blocks phage anti-CRISPR deployment,**  
853 **Related to Figure 5**

854 (A) Plaquing assays where wild-type *L. monocytogenes* phages are titrated in ten-fold dilutions  
855 (black spots) on lawns of *L. monocytogenes* (gray background) containing single-copy  
856 integrated constructs expressing *AcrIIA1* or *AcrIIA1<sup>NTD</sup>* from the  $\phi A006$  anti-CRISPR promoter  
857 (pA006), LmoCas9 from a constitutive promoter (pHyper-Cas9), and the natural CRISPR array  
858 containing spacers with complete or partial matches to the DNA of each phage. (†) Denotes the  
859 absence of a spacer targeting the virulent phage  $\phi P35$ . Representative pictures of at least  
860 3 biological replicates are shown.



861 **Table S1. AcrIIA1 homolog protein accession numbers and associated promoter**  
 862 **sequences, Related to Figures 2, 4 and 5**

| Strains Containing AcrIIA1 Homologs                       | Designated Homolog Name | Protein Accession # | Associated Promoter Sequence (5' to 3')                                                                                                                                                                                                                                                                                                                 |
|-----------------------------------------------------------|-------------------------|---------------------|---------------------------------------------------------------------------------------------------------------------------------------------------------------------------------------------------------------------------------------------------------------------------------------------------------------------------------------------------------|
| <i>Listeria monocytogenes</i> J0161                       | LmoφA006/<br>φJ0161     | WP_003722518.1      | tttactcacctctgacaacattatacgaacaaacgctcttaaaatcaagtgtaaaaaagttgtattacataaaaaatctatgaataatattcaatgaacgattttcgtcatttcaactcaactagctgttgacatcccgtttacatctgaataataacagcaacctcgaattttcggggtattttatattgaaataaattataaaaacttactactacggcattctgtagtatactatagatataagaaaaaattgaaaaggatgatgacaaa                                                                       |
| <i>Listeria monocytogenes</i> strain LMO10                | LMO10                   | KUG37233.1          | ttttgtgacgctttcacaagacatgttattatattcaagaactataaagtctagcgcgtttcggcgcgttttaattacgcattgtgcaatgaatattctatgatttaatttttagcagcaaaagaaactacaaaatttaactactactatgaataatgaaggaaaaaacactgactacgcaattttagtatttttactglaaaaaaattccaataaaaacactgactactacgattattctgtagtataatattgataagaaagacggggaataaca                                                                   |
| <i>Listeria monocytogenes</i> strain FRRB 2887            | LmoFRRB2887             | WP_085696370.1      | aaataaaaagtaacctgttttctatagattgcttttcatatataatagaagaagccgctttttagattataattgattttttagattatactcctcctgcaataacgataatagtagcaacctgaaacttttgcgggtatttttgaataaattataaaaacactgactacgcaattttagctatcttaaatataglaaagataaacgaaacggggaactaaaa                                                                                                                         |
| <i>Listeria monocytogenes</i> isolate 22B09               | Lmo22B09                | WP_077316628.1      | ttttatcagttatttaaaaaggttattctttcgtlaaaaacgctatagtagcggtttatagatagatagcctttttcttctgttgaatcggatattaccgaaagaattttcgcacgaatttccacaaaatttgcggtgaataattcttataaataatagtagtccctcggactttagtgcgggtatttttgaatattataaaaacactgactactacgaaatttactagtagtatacttaaatatagtaaaagataaacgaaacggggaactaaaa                                                                    |
| <i>Listeria seeligeri</i> FSL S4-171                      | Listeria seeligeri      | EFS02359.1          | ttgaaatgtagtgcacgcaactgttctgcttttagtagaaatagaccctcgcgacgaaaaaagataattactttccgactaacctgtaggaagatttacaatgctcgaataatcaaaaataataatgataatagtgactaacgaaatcgtagtagtactgtatagtaaaagaaacgggagagctaaaa                                                                                                                                                            |
| <i>Enterococcus rivorum</i> strain LMG 25893              | E. rivorum              | WP_069698591.1      | tggtcgtatttaggactataccgtaaaattcgtacaactgatcggagataatcgttataaataagagaagattataataaaaaattgaaaacggttattcaacagagtttcaaaaaataaagaaaaataaccgtataaatttctgctgatacgtggaccacaaaattgaaatgagcgaaactctgatttctcggatttccgaagtagaattgattataggtgggataaggaatagcactccgcttaacttaataaattaaaaggagtagatgaa                                                                      |
| <i>Listeria monocytogenes</i> CFSAN026587 plasmid         | Lmo plasmid             | WP_061665673.1      | aaactcaatagtaggagcgttgcataatcattgctgtatgcttaaaagagtcagatttaaattagatatttataaactttataaattatagtgacttaaaattataatttagtataataaaggattagagataagacataaaaaatagaaacaaatgagggtcaatgac                                                                                                                                                                               |
| <i>Leuconostoc gelidum</i> subsp. gasicomitatum KG16-1    | Leu gelidum             | CUR63869.1          | tattatttccctctaaataatagtagtataaacaagatgaactcttaattgatttccattagataaactgtaacacactgtaacattaatclattgcacactgcttaataagcgtataacttaacaaggttaagggaaggtlaaacgac                                                                                                                                                                                                   |
| <i>Lactobacillus parabuchneri</i> strain FAM23166         | Lac parabuchneri        | WP_084975236.1      | aaacctgtatagcataaagggttaactcctcggagtcataatcgggtaaatcatcgtatccgcatattcgttaattgtagtccctcagctcttttagatgagagattggagcatttttgccttttaaaacccgattttatattgatactcgtgtaacgtatgataatttaaaacatgaagttcgcacacagtttaactcgtattatttaacagtaaatcatggaggaaaaaca                                                                                                               |
| <i>Enterococcus faecalis</i> strain plasmid Efsorialis-p2 | E. faecalis             | WP_002401838.1      | ctaccataagttactgatagaaaagaaccaacagatgctcctgttggttcttttcttccagttgttaaccaggtcagtagtaggacattcaaaatgggcatacgtcatttggtaattttagtagcctttaaattacatgtaataaagtaaatggglatcgttttccactaacctggccaacagatagataggtgaaagcaaaatttaacgcaaatgtaattgattgattacatttaccattatagtagtataataagtagtaatacaagaagcctcctgaaattcaagaataggcaggtcgtcaaacctttgattataccatatacaaaaggaaggaatgaaa |
| <i>Listeria monocytogenes</i> SLCC2540, serotype 3b       | Lmo orfD                | WP_012951927.1      | acaagaacatgcaaaatttataaaaagccttcagctgcccgtcttttataaagaaaaaacctttagaagactggaaagactagaattgcagtaaaagcaaaagaaactgaaataattcattagacaatagcccgaatgaaaaattcggggcattttttataatcaaatataattgactaatcaaatatcgtgttatactatataatagtaaaagaaacgggagcgtacata                                                                                                                 |
| <i>Lactobacillus delbrueckii</i> strains                  | <i>L. delbrueckii</i>   | OOV09772.1          | not applicable; AcrIIA1 <sup>NTD</sup> homolog in core bacterial genomes found next to Type I-E, I-C, or II-A CRISPR-Cas systems                                                                                                                                                                                                                        |

863 **METHODS**

864 **CONTACT FOR REAGENT AND RESOURCE SHARING**

865 Please direct any requests for further information or reagents to the lead contact, Joseph  
866 Bondy-Denomy (joseph.bondy-denomy@ucsf.edu).

867 **EXPERIMENTAL MODEL AND SUBJECT DETAILS**

868 **Microbes**

869 *Listeria monocytogenes* strains (10403s) were cultured in brain-heart infusion (BHI) medium at  
870 30°C. All *Lmo* strains containing pPL2oexL-Rhamnose-inducible constructs were cultured in  
871 Luria broth (LB) supplemented with 50-150 mM glycerol (neutral carbon source; no  
872 induction/repression) and 0-100 mM rhamnose (inducer) as indicated. To ensure plasmid  
873 maintenance in *Listeria* strains, BHI or LB was supplemented with tetracycline (2 µg/mL) for the  
874 pPL2oexL integrated construct or erythromycin (7.5 µg/mL) for pLEB579. *Escherichia coli*  
875 (DH5α, XL1Blue, NEB 10-beta, or NEB Turbo for plasmid maintenance and SM10 for  
876 conjugation into *Listeria*) and *Pseudomonas aeruginosa* (PAO1) were cultured in LB medium at  
877 37°C. To maintain plasmids, LB was supplemented with chloramphenicol (25 µg/mL) for  
878 pPL2oexL in *E. coli*, erythromycin (250 µg/mL) for pLEB579 in *E. coli*, gentamicin (30 µg/mL) for  
879 pHERD30T in *E. coli* and *P. aeruginosa*, or carbenicillin (250 µg/mL for *P. aeruginosa*, 100  
880 µg/mL for *E. coli*) for pMMB67HE. For maintaining pHERD30T and pMMB67HE in the same *P.*  
881 *aeruginosa* strain, media was supplemented with 30 µg/mL gentamicin and 100 µg/mL  
882 carbenicillin.

883 **Phages**

884 *Listeria* phages A006, A118, A502, A620, J0161a, and their derivatives were all propagated at  
885 30°C on *acrIIA1<sup>NTD</sup>*-expressing *L. monocytogenes* 10403sφcure ( $\Delta cas9$ ,  $\Delta tRNA^{Arg}::pPL2oexL-$   
886 *acrIIA1<sup>NTD</sup>*) to allow optimal lytic growth of phages lacking their own *acrIIA1<sup>NTD</sup>*. A511 was  
887 propagated on *L. ivanovii* WSLC 3009 at 30°C and P35 on *L. monocytogenes* Mack at 20°C.  
888 The *Pseudomonas* DMS3m-like phage (JBD30) was propagated on PAO1 at 37°C. All phages  
889 were stored in SM buffer (100 mM NaCl, 8 mM MgSO<sub>4</sub>•7H<sub>2</sub>O, 50 mM Tris-HCl pH 7.5, 0.01%  
890 (w/v) gelatin), supplemented with 10 mM CaCl<sub>2</sub> for *Listeria* phages, at 4°C.

891 **Human cell lines**

892 Human HEK 293T cells (ATCC) were cultured in Dulbecco's Modified Eagle Medium (DMEM)  
893 supplemented with 10% heat-inactivated FBS (HI-FBS) and 1% penicillin/streptomycin. Media  
894 supernatant from cell cultures was analyzed monthly for the presence of mycoplasma using  
895 MycoAlert PLUS (Lonza).

## 896 **METHOD DETAILS**

### 897 **Construction of isogenic $\phi$ A006 anti-CRISPR phages**

898 Isogenic  $\phi$ A006 phages encoding distinct anti-CRISPRs from the native anti-CRISPR locus  
899 were engineered by rebooting genomic bacteriophage DNA in *L. monocytogenes* L-form cells  
900 (EGDe strain variant Rev2) as previously described (Kilcher et al., 2018). Denoted *acr* genes (\*)  
901 contain the strong ribosomal binding site (RBS) naturally associated with the first gene in the  
902 natural  $\phi$ A006 anti-CRISPR locus (*orfA*) whereas unmarked genes contain the weaker RBS  
903 associated with *acrIIA1*.

### 904 ***Listeria* phage titering**

905 A mixture of 150  $\mu$ l stationary *Listeria* culture and 3 mL molten LC top agar (10 g/L tryptone, 5  
906 g/L yeast extract, 10 g/L glucose, 7.5 g/L NaCl, 10 mM CaCl<sub>2</sub>, 10 mM MgSO<sub>4</sub>, 0.5% agar) was  
907 poured onto a BHI plate (1.5% agar) to generate a bacterial lawn, 3  $\mu$ l of phage ten-fold serial  
908 dilutions were spotted on top, and after 24 hr incubation at 30°C, plate images were collected  
909 using the Gel Doc EZ Documentation system (BioRad) and Image Lab (BioRad) software.

### 910 **Construction of *Lmo10403s*:: $\phi$ A006/ $\phi$ A118/ $\phi$ J0161a lysogens**

911 Lysogens were isolated from plaques that emerged after titring phages  $\phi$ A006,  $\phi$ A118,  
912  $\phi$ J0161a, and their derivatives on a lawn of *Lmo10403s* $\phi$ cure $\Delta$ cas9 (see "*Listeria* phage  
913 titring"). Lysogeny was confirmed by prophage induction with mitomycin C (0.5  $\mu$ g/mL)  
914 treatment as previously described (Estela et al., 1992) and by PCR amplification and Sanger  
915 sequencing of the phage anti-CRISPR locus. All *Lmo10403s* strains containing prophages were  
916 lysogenized and verified prior to introducing additional constructs (integrated pPL2oexL or  
917 episomal pLEB579).

### 918 **Construction of *L. monocytogenes* and *P. aeruginosa* strains**

919 DNA fragments were PCR-amplified from genomic, plasmid, or synthesized DNA and cloned by  
920 Gibson Assembly into *Listeria* plasmids: episomal pLEB579 (Beasley et al., 2004) or the  
921 pPL2oexL single-copy integrating plasmid derived from pPL2 (Lauer et al., 2002) or *P.*

922 *aeruginosa* plasmids: pMMB67HE or pHERD30T. To generate all *Listeria* strains, pPL2oexL  
923 plasmids were conjugated (Lauer et al., 2002; Simon et al., 1983) and pLEB579 plasmids were  
924 electroporated (Hupfeld et al., 2018; Park and Stewart, 1990) into *Lmo10403s*. For all  
925 *Pseudomonas* strains, plasmids were electroporated into PAO1 (Choi et al., 2006).

#### 926 ***Listeria* protein samples for immunoblotting**

927 Saturated overnight cultures of *Lmo10403s* strains overexpressing FLAG-tagged Cas9 ( $\Delta cas9$ ,  
928  $\Delta tRNAArg::pPL2oexL-LmoCas9-6xHis-FLAG$ ) were diluted 1:10 in BHI with appropriate  
929 antibiotic selection (see “microbes”), grown to log phase (OD<sub>600</sub> 0.2-0.6), harvested by  
930 centrifugation at 8000 g for 5 min at 4°C, and lysed by bead-beating or lysozyme treatment. For  
931 bead-beating: 4 OD<sub>600</sub> units of each culture were harvested, cell pellets were resuspended in  
932 500  $\mu$ l ice cold lysis buffer (50 mM Tris-HCl pH 8.0, 650 mM NaCl, 10 mM MgCl<sub>2</sub>, 10% glycerol,  
933 1x cOmplete mini EDTA-free protease inhibitor cocktail [Roche]), combined with ~150  $\mu$ l 0.1 mm  
934 glass beads, and vortexed for 1 hr at 4°C. Cell debris was cleared by centrifugation at 21000 g  
935 for 5 min at 4°C and supernatant was mixed with one-third volume 4X Laemmli Sample Buffer  
936 (Bio-Rad). For lysozyme lysis: 1.6 OD<sub>600</sub> units were harvested, cell pellets were resuspended in  
937 200  $\mu$ l of TE buffer supplemented with 2.5 mg/mL lysozyme and 1x cOmplete mini EDTA-free  
938 protease inhibitor cocktail (Roche), samples were incubated at 37°C for 30 min, quenched with  
939 one-third volume of 4X Laemmli Sample Buffer (Bio-Rad), and boiled for 5 min at 95°C.

#### 940 **Immunoblotting**

941 Protein samples were separated by SDS-PAGE using 4-20% Mini-PROTEAN TGX gels (Bio-  
942 Rad) and transferred in 1X Tris/Glycine Buffer onto 0.22 micron PVDF membrane (Bio-Rad).  
943 Blots were probed with the following antibodies diluted 1:5000 in 1X TBS-T containing 5%  
944 nonfat dry milk: rabbit anti-FLAG (Sigma-Aldrich Cat# F7425, RRID:AB\_439687), mouse anti-  
945 FLAG (Sigma-Aldrich Cat# F1804, RRID:AB\_262044), mouse anti-Myc (Cell Signaling  
946 Technology Cat# 2276, RRID:AB\_331783), rabbit anti-GST (Cell Signaling Technology Cat#  
947 2625, RRID:AB\_490796), mouse anti-*E.coli* RNA polymerase  $\beta$  (BioLegend Cat# 663903,  
948 RRID:AB\_2564524), HRP-conjugated goat anti-Rabbit IgG (Bio-Rad Cat# 170-6515,  
949 RRID:AB\_11125142), and HRP-conjugated goat anti-mouse IgG (Santa Cruz Biotechnology  
950 Cat# sc-2005, RRID:AB\_631736). Blots were developed using Clarity ECL Western Blotting  
951 Substrate (Bio-Rad) and chemiluminescence was detected on an Azure c600 Imager (Azure  
952 Biosystems).

953 **Bacterial growth (OD<sub>600</sub>) and fluorescence (RFU) measurements**

954 Saturated overnight cultures were diluted 1:100 in 150 µl BHI or LB media with appropriate  
955 antibiotic selection (see “microbes”) in a 96-well special optics microplate (Corning). *Listeria*  
956 cells were incubated at 30°C and *Pseudomonas* at 37°C with continuous double-orbital rotation  
957 for 16-48 hr in the Synergy H1 Hybrid Multi-Mode Reader (BioTek) and measurements of OD<sub>600</sub>  
958 and mCherry (excitation 570 nm, emission 610 nm) or RFP (excitation 555 nm, emission 610  
959 nm) relative fluorescence units (RFU) recorded every 5 min with the Gen5 (BioTek) software.  
960 For bacterial growth curves, data are displayed as the mean OD<sub>600</sub> of at least three biological  
961 replicates ± SD (error bars) as a function of time (min or hr, as indicated). For Cas9-mCherry or  
962 mCherry fluorescence levels, background fluorescence of growth media was subtracted and the  
963 resulting RFU values were normalized to OD<sub>600</sub> for each time point. Data are displayed as the  
964 mean normalized fluorescence ( $\frac{RFU - background}{OD_{600}}$ ) of three biological replicates ± SD.

965 **Quantification of Cas9 protein and mRNA reporter levels in *Listeria***

966 Cas9 (WT or dead; Lmo or Spy) reporters (see Figure 1A schematic) designed to measure  
967 protein levels contain a single RBS generating a fused Cas9-mCherry protein. Reporters for  
968 mRNA levels contain two ribosomal binding sites, one for Cas9 and a second for mCherry,  
969 generating two separate proteins. All reporters were conjugated into *Lmo10403s* devoid of  
970 endogenous *cas9* generating strains with the genotype  $\Delta cas9, \Delta tRNAArg::pPL2oexL-pHyper-$   
971 *Cas9Reporter*. Cells were grown and data collected and processed as in “bacterial growth and  
972 fluorescence measurements.” Data are shown as the percentage of Cas9 translation and  
973 transcription levels (mCherry fluorescence averaged across 6 hr of logarithmic growth) relative  
974 to control strains (no prophage (–prophage) or empty vector, as indicated) of at least three  
975 biological replicates ± SD (error bars).

976 **RT-qPCR of *cas9* mRNA levels**

977 WT or Cas9-overexpressing *Lmo10403s* ( $\Delta cas9, \Delta tRNAArg::pPL2oexL-LmoCas9-6xHis-FLAG$ )  
978 strains were grown to early (OD<sub>600</sub> 0.2-0.3) or mid-log (OD<sub>600</sub> 0.4-0.6) phase and 1.6 OD<sub>600</sub> units  
979 of cells were harvested as in “*Listeria* protein samples.” Cell pellets were resuspended in 100 µl  
980 TE buffer supplemented with 0.2 U/µl SUPERase•In RNase Inhibitor (Thermo Fisher Scientific)  
981 and 5 mg/mL lysozyme, and incubated at 37°C for 10 min. Each sample was mixed with  
982 solutions pre-heated to 65°C for 15 min: 600 µl hot 1.2X lysis buffer (60 mM NaOAc, 1.2% SDS,  
983 12 mM EDTA) and 700 µl hot acid-phenol:chloroform pH 4.5 (with IAA, 125:24:1) (Ambion).  
984 After incubating at 65°C for 30 min with shaking at 1500 rpm, followed by centrifugation at

985 12000 g for 15 min at 4°C, 500 µl aqueous phase was recovered for each sample. RNA was  
986 extracted with neutral phenol:chloroform:isoamyl alcohol (25:24:1) (Sigma) three times,  
987 precipitated with ethanol, and resuspended in nuclease-free water. Residual DNA was removed  
988 using the TURBO DNA-free Kit (Invitrogen). RT-qPCR was conducted in technical triplicate  
989 using the Luna Universal One-Step RT-qPCR Kit (New England Biolabs) according to the  
990 manufacturer's instructions in 10 µl reaction volumes and reactions were run on a CFX Real-  
991 Time PCR Detection System (BioRad). *cas9* mRNA and *16srRNA* were analyzed with the  
992 following primers: *cas9*-FWD: 5'-ATGCCGCGATAGATGGTTAC-3' and *cas9*-REV: 5'-  
993 CGCCTTCGATGTTCTCCAATA-3'; *16s*-FWD: 5'-CCTGGTAGTCCACGCCGT-3' and *16s*-REV:  
994 5'-TGCGTTAGCTGCAGCACTAAG-3'.

### 995 **Cas9 and anti-CRISPR protein expression and purification**

996 N-terminally 6xHis-tagged Acr proteins were expressed from the pET28 vector whereas WT  
997 SpyCas9 and mutants were expressed from 6xHis-MBP-Cas9 constructs (gifts from Jennifer  
998 Doudna, UC Berkeley) in *E. coli* Rosetta (DE3) pLysS cells. Recombinant protein expression  
999 was induced with 0.25 mM isopropyl β-D-1-thiogalactopyranoside (IPTG) at 18 °C overnight.  
1000 Cells were harvested by centrifugation and lysed by sonication in buffer A (50 mM Tris-HCl pH  
1001 7.5, 500 mM NaCl, 0.5 mM DTT, 20 mM imidazole, 5% glycerol) supplemented with 1 mM  
1002 PMSF and 0.25 mg/mL lysozyme (Sigma). Cell debris was removed by centrifugation at 20000  
1003 g for 40 min at 4 °C and the lysate incubated with Ni-NTA Agarose Beads (Qiagen). After  
1004 washing, bound proteins were eluted with Buffer A containing 300 mM imidazole and dialyzed  
1005 overnight into storage buffer (20 mM HEPES-NaOH pH 7.4, 150mM KCl, 10% glycerol, 2mM  
1006 DTT). GST-tagged AcrIIA1 and AcrIIA2b.3 were expressed from pGEX-6P-1 plasmids in *E.*  
1007 *coli* BL21 (DE3) cells, lysed in buffer (20 mM HEPES-NaOH pH 7.4, 300 mM KCl and 5 mM  
1008 DTT) supplemented with 1 mM PMSF and 0.25 mg/mL lysozyme, and clarified lysate was  
1009 incubated with Glutathione Agarose Beads (Pierce). After washing, bound proteins were eluted  
1010 using 100 mM Tris-HCl pH 8.5, 150 mM KCl, 15 mM reduced glutathione. The GST tag was  
1011 cleaved with PreScission Protease (Millipore) and proteins were dialyzed overnight in 50 mM  
1012 HEPES-NaOH pH 7.5, 150 mM KCl, 10% glycerol and 2 mM DTT to remove free glutathione.  
1013 Cleaved GST was removed from dialyzed proteins with Glutathione Agarose Beads (Pierce).

### 1014 ***in vitro* binding of anti-CRISPRs to SpyCas9**

1015 The binding affinities of anti-CRISPR proteins to SpyCas9 were calculated using microscale  
1016 thermophoresis (MST) on the Monolith NT.115 instrument (NanoTemper Technologies GmbH,



1017 Munich, Germany). For AcrIIA1/AcrIIA2b.3 with WT or mutant Cas9-gRNA complexes, WT and  
1018 mutant 6xHis-Cas9 proteins were incubated with two-fold molar excess gRNA (Integrated DNA  
1019 Technologies). The substrate proteins AcrIIA1/AcrIIA2b.3 at 0.09 nM to 3  $\mu$ M concentrations  
1020 were incubated with 25 nM RED-tris-NTA-labeled 6xHis-Cas9-gRNA at room temperature (RT)  
1021 for 10 min in MST buffer (50 mM Tris-HCl pH 7.4, 150 mM NaCl, 15 mM MgCl<sub>2</sub>, 0.05% Tween-  
1022 20). For AcrIIA1/AcrIIA2b.3 with apoCas9, the substrate protein apoCas9 (QB3 Macrolab) at  
1023 0.61 nM to 10  $\mu$ M concentrations was incubated with 25 nM NT-647-NHS-labeled AcrIIA1/A2b.3  
1024 proteins at RT for 10 min in MST buffer. For AcrIIA1 mutants with WT Cas9-gRNA, the substrate  
1025 protein Cas9-gRNA (QB3 Macrolab) at 15 pM to 0.5  $\mu$ M concentrations was incubated with  
1026 25 nM RED-tris-NTA-labeled 6xHis-AcrIIA1 mutant proteins at RT for 10 min in MST buffer.  
1027 Samples were loaded into Monolith NT.115 Capillaries and measurements were performed at  
1028 25 °C using 40% LED power and medium microscale thermophoresis power. All experiments  
1029 were repeated three times for each measurement. Data analyses were carried out using  
1030 NanoTemper analysis software.

#### 1031 ***in vitro* pull-downs to verify binding of anti-CRISPRs to SpyCas9**

1032 5  $\mu$ g apoCas9 proteins (WT, dead, D10A, or H840A) were incubated with two-fold molar excess  
1033 gRNA at 37°C for 15 min. Cas9-gRNA complexes were incubated with 6-fold molar excess  
1034 AcrIIA1 or AcrIIA2b.3 proteins for 15 min at room temperature in a buffer containing 20 mM  
1035 HEPES-NaOH pH 7.5, 150 mM KCl, 10% glycerol, and 1 mM DTT. Samples were then  
1036 incubated with 20  $\mu$ l Ni-NTA agarose beads (Qiagen) for 15 min at 4°C and washed five times  
1037 with 1x MST buffer (50 mM Tris-HCl pH 7.4, 150 mM NaCl, 10 mM MgCl<sub>2</sub>, 0.05 % Tween-20).  
1038 Beads were boiled in 1X Laemmli Sample Buffer and proteins were analyzed by SDS-PAGE  
1039 and Bio-Safe Coomassie staining (Biorad).

#### 1040 **Limited proteolysis of SpyCas9-AcrIIA1 complex**

1041 20  $\mu$ g purified SpyCas9 (QB3 Macrolab) in Apo form or in complex with gRNA (1.1-fold molar  
1042 excess) was incubated with 1.5-fold and 4-fold molar excess AcrIIA1 and AcrIIA2b.3,  
1043 respectively, in protease buffer (10 mM Tris-HCl pH 7.5, 300 mM NaCl) at 25°C for 15 min.  
1044 Alternatively, ApoSpyCas9 was incubated first with AcrIIA protein followed by gRNA addition.  
1045 Proteolysis reactions were performed with 20 ng  $\alpha$ -chymotrypsin (sequencing grade, Promega)  
1046 at 25°C and at 0, 10, 30, or 60 min time points, reactions were quenched with 2X SDS Laemmli  
1047 Buffer and boiled for 10 min at 95°C. Samples were analyzed by SDS-PAGE and staining with  
1048 Bio-Safe Coomassie (Bio-Rad).

1049 **SpyCas9 protein decay measurements in *Listeria***

1050 Saturated overnight cultures of *Lmo10403s* strains devoid of endogenous *cas9* and expressing  
1051 *AcrIIA1* or *AcrIIA4* from a tightly regulated rhamnose-inducible promoter (Fieseler et al., 2012)  
1052 and *SpyCas9-mCherry* from the constitutively active *pHyper* promoter ( $\Delta cas9$ ,  
1053  $\Delta tRNAArg::pPL2oexL-pHyper-SpyCas9-mCherry-GyrA\_terminator-pRha-AcrIIA$ ) were diluted  
1054 1:100 in fresh LB supplemented with 50 mM glycerol and tetracycline (2  $\mu\text{g}/\text{mL}$ ) and grown to  
1055 mid-log ( $OD_{600} \sim 0.5$ ). Cultures were then diluted 1:2 in LB containing 50 mM glycerol and  
1056 tetracycline (2  $\mu\text{g}/\text{mL}$ ) plus 200 mM rhamnose to induce *Acr* expression or 200 mM glycerol for  
1057 uninduced controls (100 mM final concentration rhamnose or glycerol) in a 96-well microplate  
1058 and treated with gentamicin (5  $\mu\text{g}/\text{mL}$ ) to inhibit translation or water as a control. Cells were  
1059 grown and data collected and processed as in “bacterial growth and fluorescence  
1060 measurements.” Data are shown as the mean percentage of *SpyCas9-mCherry* fluorescence  
1061 relative to levels measured at “0 hr” (the beginning of translation inhibition or anti-CRISPR  
1062 induction) of at least three biological replicates  $\pm$  SD (error bars) as a function of time (min).  
1063 Data were fitted by nonlinear regression to generate best-fit decay curves.

1064 ***Listeria* CRISPRi and self-targeting**

1065 Single-copy integrating CRISPRi and self-targeting constructs (see Figure 1E schematics) were  
1066 designed as follows: *pPL2oexL-pHyper-sgRNA [pHELP-spacer] GyrATerminator-pRhamnose-*  
1067 *Cas9* (*Lmo* WT or *Lmo* dead or *Spy* dead) *LambdaTerminator-pHELP-mCherry-LuxTerminator*  
1068 and conjugated into *Lmo10403s*  $\phi$ cure $\Delta cas9$  containing *pLEB579* plasmids expressing the  
1069 indicated anti-CRISPRs. Overnight cultures were grown in LB supplemented with 50 mM  
1070 glycerol (no induction/repression), 2  $\mu\text{g}/\text{mL}$  tetracycline, and 7.5  $\mu\text{g}/\text{mL}$  erythromycin. Cultures  
1071 were then diluted 1:100 in LB containing 50 mM glycerol and the aforementioned antibiotics plus  
1072 200 mM rhamnose to induce *Cas9* expression (and thus, CRISPRi or self-targeting) or 200 mM  
1073 glycerol for uninduced controls (100 mM final concentration rhamnose or glycerol) in a 96-well  
1074 microplate. Cells were grown and data collected and processed as in “bacterial growth and  
1075 fluorescence measurements.” For self-targeting, data are displayed as the mean  $OD_{600}$  of at  
1076 least three biological replicates  $\pm$  SD (error bars) as a function of time (hr). For CRISPRi, data  
1077 are shown as the mean percentage *mCherry* expression (*mCherry* fluorescence averaged  
1078 across 6 hr of logarithmic growth) relative to uninduced controls of at least three biological  
1079 replicates  $\pm$  SD (error bars).

1080 **Plaque forming unit (PFU) quantification of *Listeria* phages**

1081 Phage infections were conducted using the soft agar overlay method: 10  $\mu$ l phage dilution was  
1082 mixed with 150  $\mu$ l stationary *Listeria* culture in 3 mL molten LC top agar supplemented with 300  
1083  $\mu$ g/mL Tetrazolium Violet (TCI Chemicals) to generate contrast for plaque visualization (Hurst et  
1084 al., 1994) and poured onto a BHI-agar plate. After 24 hr incubation at 30°C, phage plaque-  
1085 forming units (PFU) were quantified.

1086 **Efficiency of plaquing of *Listeria* phages**

1087 Efficiency of plaquing (EOP) calculations are a ratio of the number of plaque forming units  
1088 (PFUs) that formed on a *Lmo10403s* $\phi$ cure targeting strain (endogenous *cas9* with  
1089 overexpression of the native CRISPR array spacer #1 that targets  $\phi$ A006) divided by the  
1090 number of PFUs that formed on a non-targeting strain ( $\Delta$ *cas9*). Each PFU measurement was  
1091 conducted in biological triplicate and all EOP data is displayed as the mean EOP  $\pm$  SD (error  
1092 bars).

1093 **Construction of self-targeting 10403s:: $\phi$ A006 lysogens**

1094 *Lmo10403s* $\Delta$ *cas9*:: $\phi$ A006 isogenic self-targeting lysogens encoding no anti-CRISPR or AcrIIA1,  
1095 AcrIIA4, AcrIIA12 (alone or in combination as indicated) were isolated as in “construction of  
1096 *Lmo10403s* lysogens.” To prevent self-targeting during strain construction, pPL2oexL constructs  
1097 encoding a tightly regulated rhamnose-inducible LmoCas9 (WT or dead as a control) were  
1098 conjugated into each lysogen. To assess the stability of each lysogen, cells were cultured, Cas9  
1099 induced, and data displayed as described for the self-targeting strain in “*Listeria* CRISPRi and  
1100 self-targeting,” except erythromycin was omitted from LB media. Each lysogen stability  
1101 measurement was performed in biological triplicate.

1102 ***P. aeruginosa* anti-SpyCas9 screening platform**

1103 The previously described *P. aeruginosa* anti-SpyCas9 screening platform (Jiang et al., 2019)  
1104 and bacteriophage plaque assays (Borges et al., 2018; Jiang et al., 2019) were utilized to assay  
1105 the anti-CRISPR activity of AcrIIA1 homologs and mutants. AcrIIA1 homolog genes were  
1106 synthesized (Twist Bioscience) and cloned into the pMMB67HE- $P_{Lac}$  vector. Protein accession  
1107 numbers are listed in Table S1. Site directed mutagenesis by Gibson Assembly was used to  
1108 introduce point mutations into pMMB67HE- $P_{Lac}$ -GST-AcrIIA1. The  $P_{BAD}$  promoter driving  
1109 chromosomally integrated SpyCas9-3xMyc and pHERD30T-sgRNA was induced with 0.1%  
1110 arabinose and the  $P_{Lac}$  promoter driving pMMB67HE-AcrIIA with 1 mM IPTG. Expression of

1111 AcrIIA1 mutants was confirmed by harvesting 1 OD<sub>600</sub> unit of cells and resuspending in 200 µl  
1112 1X Laemmli Sample Buffer (Bio-Rad) followed by SDS-PAGE and immunoblotting as described  
1113 above. The fold reductions in phage titer displayed were qualitatively derived by examining at  
1114 least three replicates of each experiment. Plate images were acquired as in “*Listeria* phage  
1115 titering” and a representative picture is shown.

#### 1116 ***P. aeruginosa* self-targeting and CRISPRi**

1117 Strains were generated as previously described by Borges et al., 2018 under “construction of  
1118 PAO1::SpyCas9 expression strain,” except the sgRNA was designed to target the PAO1  
1119 chromosomal *phzM* gene promoter and was integrated into the bacterial genome using the mini-  
1120 CTX2 vector (Hoang et al., 2000). Cultures were grown overnight in LB supplemented with 50  
1121 µg/mL gentamicin and 0.1% arabinose to pre-induce anti-CRISPR expression and the next day  
1122 diluted 1:100 with fresh LB containing 50 µg/mL gentamicin, 0.1% arabinose, and IPTG (0, 0.01,  
1123 0.1 or 1mM to titrate WT or dead SpyCas9-sgRNA expression) in a 96-well microplate (150  
1124 µl/well) for self-targeting analysis or glass tubes (3 mL) for CRISPRi. Self-targeting experiments  
1125 were conducted in biological triplicate with cells grown and data collected and processed as in  
1126 “bacterial growth and fluorescence measurements.” For CRISPRi, cells were grown for 8-10 hr  
1127 with continuous shaking after which CRISPRi was qualitatively assessed by inspecting the  
1128 culture pigment. Repression of the *phzM* gene by dCas9 generates a yellow culture whereas  
1129 inhibition of dCas9 (e.g. by an Acr) allows *phzM* expression and pyocyanin production that  
1130 generates a green culture. Representative pictures of at least three biological replicates are  
1131 shown.

#### 1132 **Co-immunoprecipitation of SpyCas9-3xMyc and GST-AcrIIA**

1133 Saturated overnight cultures of *P. aeruginosa* strains were diluted 1:100 in 50 mL of LB  
1134 supplemented with required antibiotics, grown to OD<sub>600</sub> 0.3-0.4, and induced with 0.3%  
1135 arabinose (SpyCas9-gRNA) and 1mM IPTG (anti-CRISPR). Cells were harvested at OD<sub>600</sub> 1.8-  
1136 2.0 by centrifugation at 6000 g for 10 min at 4°C, flash frozen on dry ice, resuspended in 1 mL  
1137 lysis buffer (50 mM Tris-Cl pH 7.4, 150 mM NaCl, 20 mM MgCl<sub>2</sub>, 0.5% NP-40, 5% (v/v) glycerol,  
1138 5 mM DTT, 1 mM PMSF), lysed by sonication (20 sec pulse x 4 cycles with cooling between  
1139 cycles), and lysate was clarified by centrifugation at 14 000g for 10 min at 4°C. For input  
1140 samples, 10 µL lysate was mixed with one-third volume 4X Laemmli Sample Buffer. Remaining  
1141 lysate (~1 mL) was mixed with pre-washed Myc-Tag Magnetic Bead Conjugate #5698 (Cell  
1142 Signaling Technology) or Glutathione Magnetic Agarose Beads #78601 (Thermo Fisher

1143 Scientific) using a lysate to bead slurry volume ratio of 20:1 for Myc or 40:1 for GST. After  
1144 overnight incubation at 4°C with end-over-end rotation, beads were washed five times with 1 mL  
1145 cold wash buffer (50 mM Tris-HCl pH 7.4, 150 mM NaCl, 20 mM MgCl<sub>2</sub>, 5mM DTT) containing  
1146 decreasing concentrations of NP-40 (0.5%, 0.05%, 0.01%, 0.005%, 0) and glycerol (5%, 0.5%,  
1147 0.05%, 0.005%, 0) on a magnetic stand. Bead-bound proteins were resuspended in 100 µl  
1148 wash buffer without detergent and glycerol. 10 µl bead-bound protein slurry was mixed with  
1149 one-third volume 4X Laemmli Sample Buffer, boiled for 5 min at 95°C, and samples were  
1150 analyzed by SDS-PAGE using 4-20% Mini-PROTEAN TGX gels (Bio-Rad) and staining with  
1151 Bio-Safe Coomassie (Bio-Rad) or immunoblotting.

#### 1152 **Cas9 DNA cleavage assays using immunoprecipitated SpyCas9-3xMyc**

1153 Reactions were assembled with bead-bound protein slurry and 1.5 nM DNA substrate,  
1154 incubated at 25°C with gentle shaking at 1000 rpm, and at 1, 5, 10, and 30 min time points  
1155 reaction aliquots were mixed with warm Quenching Buffer (50 mM EDTA, 0.02% SDS) and  
1156 boiled at 95°C for 10 min. DNA cleavage products were analyzed by agarose (1%) gel  
1157 electrophoresis and staining with SYBR Safe (Thermo Fisher Scientific).

#### 1158 **Cas9 DNA cleavage assays using purified proteins**

1159 To generate gRNAs, crRNA and tracrRNA were annealed with Nuclease-free Duplex Buffer  
1160 (Integrated DNA Technologies) according to the manufacturer's instructions. Reactions were  
1161 assembled in 1X MST Buffer (50 mM Tris-Cl pH 7.4, 150 mM NaCl, 20 mM MgCl<sub>2</sub>, 5 mM DTT,  
1162 5% glycerol, 0.05% (v/v) Tween-20) with 50 nM SpyCas9 and 625 nM AcrIIA, incubated for 5  
1163 min on ice, supplemented with 50 nM gRNA, and incubated for an additional 5 min at room  
1164 temperature. Reactions were initiated by adding 2 nM target DNA substrate and at 1, 2, 5 and  
1165 10 min time points reaction aliquots were mixed with warm Quenching Buffer (50mM EDTA,  
1166 0.02% SDS) and boiled at 95°C for 10 min. DNA cleavage products were analyzed by agarose  
1167 (1%) gel electrophoresis and staining with SYBR Safe (Thermo Fisher Scientific).

#### 1168 ***E. coli* phage Mu plaquing assays**

1169 Plasmids expressing Type II-A, II-B, and II-C Cas9-sgRNA combinations were previously  
1170 described (Garcia et al., 2019, *in revision*). Cas9 plasmids containing a spacer targeting phage  
1171 Mu and a pCDF-1b plasmid expressing the indicated anti-CRISPR proteins were co-  
1172 transformed into *E. coli* BB101. After 2 hr of growth in LB at 37°C with continuous shaking, cells  
1173 were treated with 0.01 mM IPTG to induce anti-CRISPR expression, and incubated for an

1174 additional 3 hr. A mixture of cells and LB top agar (0.7% agar) was poured onto an LB plate  
1175 supplemented with 200 ng/mL aTc, 0.2% arabinose, and 10 mM MgSO<sub>4</sub>. Ten-fold serial  
1176 dilutions of phage Mu were spotted on top and plates were incubated overnight. Anti-CRISPR  
1177 expression after IPTG induction was analyzed by SDS-PAGE on a 15% Tris-Tricine gel followed  
1178 by Coomassie Blue staining as previously described (Lee et al., 2018).

#### 1179 **Inhibition of *LivCas9* by anti-CRISPR proteins**

1180 Plaquing assays were conducted as previously described by Hupfeld et al., 2018. Briefly, a  
1181 pKSV7-derived plasmid expressing AcrIIA1 from the ΦA006 anti-CRISPR promoter or empty  
1182 vector and pLRSR-crRNA plasmids with a spacer against phage ΦP35, ΦA511, or a non-  
1183 targeting control were transformed into a *Listeria monocytogenes* Mack strain containing  
1184 chromosomally-integrated pHelp-LivCas9/tracrRNA or a *Listeria ivanovii* WSLC 30167 strain  
1185 with an endogenous Type II-A LivCas9 system. A mixture of 200 μl stationary host culture and 4  
1186 mL LC top agar was poured onto an agar plate (LC for ΦP35; 1/2 BHI for ΦA511). Ten-fold  
1187 serial dilutions of phage were spotted on top, plates were incubated at 20°C for ΦP35 and 30°C  
1188 for ΦA511 for one day, and plate images were subsequently acquired.

#### 1189 **Generation of human cell expression plasmids**

1190 Descriptions of plasmids used for expression of sgRNAs (including sgRNA/crRNA target  
1191 sequences), nucleases, and Acr proteins in human cells are available upon request. U6  
1192 promoter sgRNA and crRNA expression plasmids were generated by annealing and ligating  
1193 oligonucleotide duplexes into BsmBI-digested BPK1520, BPK2660, KAC14, KAC27, KAC482,  
1194 KAC32 and BPK4449 for SpyCas9, SauCas9, St1Cas9, St3Cas9, CjeCas9, and NmeCas9,  
1195 respectively. New human cell expression plasmids for CjeCas9, St3Cas9, and NmeCas9 were  
1196 generated by sub-cloning the nuclease open-reading frames of Addgene plasmids # 89752,  
1197 68337, and 119923, respectively (gifts from Seokjoong Kim, Feng Zhang and Erik Sontheimer)  
1198 into the AgeI and NotI sites of pCAG-CFP (Addgene plasmid 11179; a gift from C. Cepko).  
1199 Human codon optimized Acr constructs containing a C-terminal SV40 nuclear localization signal  
1200 were generated by isothermal assembly of synthetic gene fragments (Twist Biosciences) into  
1201 the NotI and AgeI sites of Addgene plasmid ID 43861. New human expression plasmids  
1202 described in this study have been deposited with Addgene.

#### 1203 **Transfection of human cells**



1204 Approximately 20 hours prior to transfection, HEK 293T cells were seeded at  $2 \times 10^4$  cells/well in  
1205 96-well plates. Cells were transfected using 70 ng of nuclease, 30 ng sgRNA/crRNA, and 110  
1206 ng of anti-CRISPR expression plasmids with 1.25  $\mu$ l of *TransIT-X2* (Mirus Bio) in 20  $\mu$ l Opti-  
1207 MEM. For control conditions containing no acr plasmid, 110 ng of a pCMV-EGFP plasmid was  
1208 utilized as filler DNA; for non-targeting sgRNA/crRNA conditions, 30 ng of an empty U6  
1209 promoter plasmid was used as filler DNA. Genomic DNA was harvested from cells 72 hours  
1210 post-transfection by suspending cells in 100  $\mu$ l of lysis buffer (20 mM Hepes pH 7.5, 100 mM  
1211 KCl, 5 mM MgCl<sub>2</sub>, 5% glycerol, 25 mM DTT, 0.1% Triton X-100, and 30 ng/ $\mu$ l Proteinase K  
1212 (NEB)), followed by incubation at 65°C for 6 minutes and 98°C for 2 minutes. All experiments  
1213 were performed with at least 3 independent biological replicates.

#### 1214 **Assessment of Cas and Acr protein activities in human cells**

1215 Genome editing efficiencies were determined by next-generation sequencing using a 2-step  
1216 PCR-based Illumina library construction method. Briefly, genomic regions were initially amplified  
1217 using Q5 High-Fidelity DNA Polymerase (NEB), ~100 ng of genomic DNA lysate, and gene-  
1218 specific round 1 primers. PCR products were purified using paramagnetic beads as previously  
1219 described (Kleinstiver et al., 2019) and diluted 1:100 prior to the 2<sup>nd</sup> round of PCR to add  
1220 Illumina barcodes and adapter sequences using Q5 polymerase. PCR amplicons were bead  
1221 purified, quantified and normalized (Qiagen QIAxcel), and pooled. Final libraries were quantified  
1222 using an Illumina Library qPCR Quantification Kit (KAPA Biosystems) and sequenced on a  
1223 MiSeq sequencer using a 300-cycle v2 kit (Illumina). Genome editing activities were determined  
1224 from the sequencing data using CRISPResso2 (Clement et al., 2019) with commands --  
1225 min\_reads\_to\_use\_region 100 and -w 10.

#### 1226 **Quantification of prophage induction efficiency**

1227 Prophages were induced from *Lmo10403s::ΦJ0161* lysogens expressing *cis-acrIIA1* from the  
1228 prophage Acr locus or *trans-acrIIA1* from the bacterial host genome by treating with 0.5  $\mu$ g/mL  
1229 mitomycin C as previously described (Estela et al., 1992). After overnight incubation with  
1230 continuous shaking at 30°C, cells were pelleted by centrifugation at 8000 g for 10 min and  
1231 phage-containing supernatants were harvested. To quantify the amount of phage induced from  
1232 each lysogen, phage-containing supernatants were used to infect *Lmo10403sΦcure* lacking  
1233 *cas9* and expressing *AcrIIA1<sup>NTD</sup>* ( $\Delta cas9; II A 1^{NTD}$ ), to bypass the lytic growth defect of  
1234  $\Phi J 0 1 6 1 \Delta a c r I I A 1 - 2$ ) as described in “plaque forming unit (PFU) quantification of *Listeria* phages”

1235 and the resulting PFUs were quantified. Data are displayed as the mean PFU/mL after  
1236 prophage induction of four biological replicates  $\pm$  SD (error bars).

### 1237 **Transcriptional repression of the *acr* promoter**

1238 To generate *acr* promoter transcriptional reporters, the nucleotide sequences (~100-350 base  
1239 pairs) upstream of putative *acr* loci encoding *acrIIA1* homologs were synthesized (Twist  
1240 Bioscience) and cloned upstream of an mRFP gene into the pHERD30T vector. Promoter  
1241 sequences are listed in Table S1. Transcriptional reporters were electroporated into *P.*  
1242 *aeruginosa* PAO1 strains containing pMMB67HE-AcrIIA1-variants. Saturated overnight cultures  
1243 were diluted 1:10 in LB supplemented with 30  $\mu$ g/mL gentamicin, 100  $\mu$ g/mL carbenicillin, and 1  
1244 mM IPTG to induce AcrIIA1 expression in a 96-well microplate. Cells were grown and data  
1245 collected as in “bacterial growth and fluorescence measurements.” Data are shown as the mean  
1246 percentage RFP repression (RFU values at 960 min for AcrIIA1 mutants and 1170 min for  
1247 homologs, normalized to OD<sub>600</sub>) in the presence of AcrIIA1 relative to controls lacking AcrIIA1 of  
1248 at least three biological replicates  $\pm$  SD (error bars).

### 1249 ***in vitro* binding of AcrIIA1 to the anti-CRISPR promoter**

1250 The affinities of AcrIIA1 and individual domains for DNA were measured in triplicate using MST  
1251 as described above. Single-stranded complementary oligonucleotides were annealed to  
1252 generate 40 bp *acr* promoter fragments harboring WT or mutated palindrome. The DNA  
1253 substrate at 0.15 nM to 5  $\mu$ M concentrations was incubated with 12.5 nM RED-tris-NTA-labeled  
1254 AcrIIA1/domains at room temperature for 10 min in 1x buffer (50 mM Tris-HCl pH 7.4, 150 mM  
1255 NaCl, 10 mM MgCl<sub>2</sub>, 0.05 % Tween-20). DNA substrate sequences used are as follows:

1256 5'-AACTATTGACTACTACGTATATTCG**TAGT**AATAATGTGAAT-3' (Wild-type)

1257 5'-AACTATTGACAACTACGTATATTCG**TAGT**TTAATAATGTGAAT-3' (Terminal Mutations)

1258 5'-AACTATTGACAA**CA**ACCTATATTGGTTGTTAATAATGTGAAT-3' (Six Mutations)

### 1259 **QUANTIFICATION AND STATISTICAL ANALYSIS**

1260 All numerical data, with the exception of the microscale thermophoresis (MST) data, were  
1261 analyzed and plotted using GraphPad Prism 6.0 software. The MST data were analyzed using  
1262 the NanoTemper analysis software (NanoTemper Technologies GmbH) and plotted using  
1263 GraphPad Prism 6.0 software. Statistical parameters are reported in the Figure Legends.

### 1264 **DATA AND SOFTWARE AVAILABILITY**

1265 The AcrIIA1 homolog protein accession numbers and associated promoter sequences are  
1266 disclosed in Table S1.
